# Supplementary material for: Effects of genetics and sex on adolescent behaviors following neonatal ethanol exposure in BXD recombinant inbred strains
Source: Front Neurosci. 2023 Jul 26;17:1197292. doi: 10.3389/fnins.2023.1197292 (PMC10410115; doi:10.3389/fnins.2023.1197292)
Supplement: Supplementary file 2 [file Table_2.XLSX]

## Sheet: EPM Stats
	B6			D2			BXD60			BXD71			BXD48A			BXD100
Elevated Plus Maze	F (DFm, DFd)	p-value	% of Total Variation	F (DFm, DFd)	p-value	% of Total Variation	F (DFm, DFd)	p-value	% of Total Variation	F (DFm, DFd)	p-value	% of Total Variation	F (DFm, DFd)	p-value	% of Total Variation	F (DFm, DFd)	p-value	% of Total Variation
Total Distance Travelled
Interaction	F (1, 42) = 0.1996	0.6574	0.4455	F (1, 30) = 4.201	0.0492	12.16	F (1, 28) = 0.02705	0.8706	0.09296	F (1, 32) = 0.9230	0.3439	2.524	F (1, 29) = 0.002509	0.9604	0.006643	F (1, 34) = 0.5521	0.4626	1.583
Sex	F (1, 42) = 0.6205	0.4353	1.385	F (1, 30) = 0.001485	0.9695	0.004298	F (1, 28) = 0.008076	0.929	0.02776	F (1, 32) = 1.735	0.1972	4.743	F (1, 29) = 8.735	0.0061	23.13	F (1, 34) = 0.2797	0.6004	0.8021
Treatment	F (1, 42) = 1.918	0.1734	4.282	F (1, 30) = 0.2275	0.6369	0.6582	F (1, 28) = 1.059	0.3124	3.638	F (1, 32) = 2.114	0.1557	5.78	F (1, 29) = 0.0002847	0.9867	0.0007538	F (1, 34) = 0.05259	0.82	0.1508
Number of Entries to the Open Arms
Interaction	F (1, 42) = 2.176	0.1476	4.857	F (1, 30) = 4.667	0.0389	13.28	F (1, 28) = 0.01356	0.9081	0.0478	F (1, 32) = 0.7398	0.3961	2.02	F (1, 29) = 0.2603	0.6138	0.8324	F (1, 34) = 0.4456	0.509	1.24
Sex	F (1, 42) = 0.6126	0.4382	1.367	F (1, 30) = 0.1280	0.723	0.3643	F (1, 28) = 0.02411	0.8777	0.08498	F (1, 32) = 1.332	0.2569	3.639	F (1, 29) = 1.757	0.1953	5.62	F (1, 34) = 0.7571	0.3903	2.108
Treatment	F (1, 42) = 0.007014	0.9337	0.01565	F (1, 30) = 0.2108	0.6495	0.5998	F (1, 28) = 0.3391	0.565	1.195	F (1, 32) = 2.775	0.1055	7.579	F (1, 29) = 0.1631	0.6893	0.5215	F (1, 34) = 0.7780	0.3839	2.166
Time Spent in Open Arms
Interaction	F (1, 42) = 0.1215	0.7291	0.285	F (1, 30) = 0.2305	0.6347	0.741	F (1, 28) = 0.6888	0.4136	2.266	F (1, 32) = 0.7827	0.3829	2.323	F (1, 29) = 0.03388	0.8553	0.1124	F (1, 34) = 1.658	0.2065	4.017
Sex	F (1, 42) = 0.09761	0.7563	0.2289	F (1, 30) = 0.6248	0.4355	2.009	F (1, 28) = 0.9149	0.347	3.01	F (1, 32) = 1.009	0.3226	2.995	F (1, 29) = 1.103	0.3022	3.66	F (1, 34) = 0.5329	0.4704	1.291
Treatment	F (1, 42) = 0.4376	0.5119	1.026	F (1, 30) = 0.2185	0.6436	0.7025	F (1, 28) = 0.7943	0.3804	2.613	F (1, 32) = 0.05307	0.8193	0.1575	F (1, 29) = 0.003189	0.9554	0.01058	F (1, 34) = 4.783	0.0357	11.58
% Time in Open Arms
Interaction	F (1, 42) = 0.1215	0.7291	0.285	F (1, 30) = 0.2305	0.6347	0.741	F (1, 28) = 0.6888	0.4136	2.266	F (1, 32) = 0.7827	0.3829	2.323	F (1, 29) = 0.03388	0.8553	0.1124	F (1, 34) = 1.658	0.2065	4.017
Sex	F (1, 42) = 0.09761	0.7563	0.2289	F (1, 30) = 0.6248	0.4355	2.009	F (1, 28) = 0.9149	0.347	3.01	F (1, 32) = 1.009	0.3226	2.995	F (1, 29) = 1.103	0.3022	3.66	F (1, 34) = 0.5329	0.4704	1.291
Treatment	F (1, 42) = 0.4376	0.5119	1.026	F (1, 30) = 0.2185	0.6436	0.7025	F (1, 28) = 0.7943	0.3804	2.613	F (1, 32) = 0.05307	0.8193	0.1575	F (1, 29) = 0.003189	0.9554	0.01058	F (1, 34) = 4.783	0.0357	11.58
Number of Entries to the Closed Arms
Interaction	F (1, 42) = 1.543	0.2211	3.518	F (1, 30) = 2.885	0.0997	8.473	F (1, 28) = 0.04078	0.8414	0.1452	F (1, 32) = 0.4847	0.4913	1.34	F (1, 29) = 0.1425	0.7085	0.4165	F (1, 34) = 0.4970	0.4856	1.386
Sex	F (1, 42) = 0.1335	0.7167	0.3043	F (1, 30) = 0.2951	0.591	0.8667	F (1, 28) = 0.001631	0.9681	0.005809	F (1, 32) = 1.411	0.2436	3.904	F (1, 29) = 5.065	0.0322	14.8	F (1, 34) = 0.5818	0.4509	1.623
Treatment	F (1, 42) = 0.1335	0.7167	0.3043	F (1, 30) = 0.6924	0.4119	2.033	F (1, 28) = 0.04078	0.8414	0.1452	F (1, 32) = 2.411	0.1303	6.669	F (1, 29) = 0.03446	0.854	0.1007	F (1, 34) = 0.8336	0.3677	2.325
Time Spent in Closed Arms
Interaction	F (1, 42) = 0.1397	0.7105	0.3275	F (1, 30) = 0.2313	0.6341	0.7436	F (1, 28) = 0.6876	0.414	2.262	F (1, 32) = 0.6603	0.4224	1.957	F (1, 29) = 0.04539	0.8328	0.1501	F (1, 34) = 1.671	0.2049	4.043
Sex	F (1, 42) = 0.08812	0.768	0.2066	F (1, 30) = 0.6248	0.4355	2.009	F (1, 28) = 0.9134	0.3474	3.005	F (1, 32) = 1.171	0.2873	3.47	F (1, 29) = 1.179	0.2866	3.898	F (1, 34) = 0.5268	0.4729	1.275
Treatment	F (1, 42) = 0.4569	0.5028	1.071	F (1, 30) = 0.2197	0.6427	0.7063	F (1, 28) = 0.7947	0.3803	2.614	F (1, 32) = 0.02498	0.8754	0.07404	F (1, 29) = 0.003819	0.9511	0.01263	F (1, 34) = 4.811	0.0352	11.64
% Time in Closed Arms
Interaction	F (1, 42) = 0.1397	0.7105	0.3275	F (1, 30) = 0.2313	0.6341	0.7436	F (1, 28) = 0.6876	0.414	2.262	F (1, 32) = 0.6603	0.4224	1.957	F (1, 29) = 0.04539	0.8328	0.1501	F (1, 34) = 1.671	0.2049	4.043
Sex	F (1, 42) = 0.08813	0.768	0.2066	F (1, 30) = 0.6248	0.4355	2.009	F (1, 28) = 0.9134	0.3474	3.005	F (1, 32) = 1.171	0.2873	3.47	F (1, 29) = 1.179	0.2866	3.898	F (1, 34) = 0.5268	0.4729	1.275
Treatment	F (1, 42) = 0.4569	0.5028	1.071	F (1, 30) = 0.2197	0.6427	0.7063	F (1, 28) = 0.7947	0.3803	2.614	F (1, 32) = 0.02498	0.8754	0.07404	F (1, 29) = 0.003819	0.9511	0.01263	F (1, 34) = 4.811	0.0352	11.64

## Sheet: EPM Means
	B6			D2			BXD60			BXD71			BXD48A			BXD100
Elevated Plus Maze	Mean	SEM	N	Mean	SEM	N	Mean	SEM	N	Mean	SEM	N	Mean	SEM	N	Mean	SEM	N
Total Distance Travelled
Control Female	10.6664	0.515395	12	5.54488	0.629778	8	8.03819	0.465649	8	6.70114	1.09339	7	5.63194	0.279048	8	5.73689	0.583062	9
Ethanol Female	11.6341	0.359736	12	6.88419	0.878609	8	7.32929	0.45818	8	8.64244	0.706623	8	5.65092	0.397634	8	5.17028	0.52871	9
Control Male	10.4863	0.669618	11	7.32317	1.10352	9	7.99388	0.704841	8	6.41465	0.973878	10	3.97169	0.399502	8	4.99575	0.604942	10
Ethanol Male	10.982	0.548484	11	5.17154	0.657975	9	7.48038	0.698604	8	6.81117	0.390948	11	3.93343	0.880092	9	5.2951	0.594714	10
Number of Entries to the Open Arms
Control Female	5.56944	0.400157	12	3.875	0.47949	8	5.58333	0.470351	8	4.71429	0.688832	7	3.97917	0.386321	8	4.16667	0.640095	9
Ethanol Female	6.18056	0.329178	12	5.04167	0.649137	8	5.20833	0.480523	8	6.125	0.603191	8	4.04167	0.658243	8	3.44444	0.420354	9
Control Male	6.45455	0.459518	11	5.11111	1.01986	9	5.4375	0.650807	8	4.55	0.607591	10	3.5	0.61962	8	3.45	0.36094	10
Ethanol Male	5.90909	0.374276	11	3.31481	0.336151	9	5.1875	0.525574	8	5	0.350325	11	2.96296	0.626558	9	3.35	0.421966	10
Time Spent in Open Arms
Control Female	125.681	11.6019	12	113.744	20.7194	8	122.098	5.35668	8	134.207	23.823	7	99.4354	18.0453	8	105.756	14.1314	9
Ethanol Female	128.428	5.95547	12	113.546	7.52702	8	121.592	6.26673	8	119.463	8.19412	8	93.8979	17.4406	8	117.611	16.0636	9
Control Male	119.877	7.64507	11	118.606	13.8235	9	136.863	9.9904	8	109.225	11.7644	10	119.381	14.1177	8	79.155	8.71678	10
Ethanol Male	128.745	8.67442	11	133.446	17.2298	9	122.638	10.2687	8	117.877	8.90921	11	122.319	33.3439	9	124.965	13.4099	10
% Time in Open Arms
Control Female	41.8935	3.86729	12	37.9146	6.90645	8	40.6993	1.78556	8	44.7357	7.94099	7	33.1451	6.0151	8	35.2519	4.71046	9
Ethanol Female	42.8093	1.98516	12	37.8486	2.509	8	40.5306	2.08891	8	39.8208	2.73137	8	31.2993	5.81353	8	39.2037	5.35454	9
Control Male	39.9591	2.54836	11	39.5352	4.60783	9	45.6208	3.33013	8	36.4083	3.92147	10	39.7937	4.70592	8	26.385	2.90559	10
Ethanol Male	42.9152	2.89147	11	44.4821	5.74328	9	40.8792	3.42289	8	39.2924	2.96974	11	40.7728	11.1146	9	41.655	4.46998	10
Number of Entries to the Closed Arms
Control Female	5.38889	0.395329	12	4	0.534522	8	5.125	0.548944	8	4.57143	0.790031	7	4.33333	0.31966	8	4.05556	0.658515	9
Ethanol Female	6	0.302208	12	4.58333	0.671116	8	4.91667	0.437571	8	5.8125	0.582003	8	4.02083	0.698949	8	3.27778	0.391854	9
Control Male	6	0.431699	11	4.77778	0.950552	9	5	0.534522	8	4.3	0.553775	10	2.875	0.3629	8	3.35	0.37305	10
Ethanol Male	5.66667	0.387298	11	3.07407	0.351486	9	5	0.534522	8	4.77273	0.332782	11	2.98148	0.677256	9	3.25	0.466964	10
Time Spent in Closed Arms
Control Female	174.099	11.5923	12	186.244	20.7236	8	177.881	5.35969	8	165.793	23.823	7	197.942	16.4796	8	194.239	14.133	9
Ethanol Female	171.45	5.95818	12	186.435	7.52237	8	178.396	6.26549	8	178.512	7.28952	8	204.002	16.5039	8	182.372	16.0656	9
Control Male	179.977	7.61361	11	181.394	13.8235	9	163.125	9.9876	8	190.62	11.769	10	178.7	13.2993	8	220.83	8.71788	10
Ethanol Male	170.776	8.65645	11	166.517	17.2382	9	177.35	10.2787	8	182.042	8.85928	11	175.365	32.4153	9	174.905	13.3748	10
% Time in Closed Arms
Control Female	58.0329	3.86409	12	62.0812	6.90788	8	59.2938	1.78656	8	55.2643	7.94099	7	65.9806	5.49319	8	64.7463	4.711	9
Ethanol Female	57.15	1.98606	12	62.1451	2.50746	8	59.4653	2.0885	8	59.5042	2.42984	8	68.0007	5.50129	8	60.7907	5.3552	9
Control Male	59.9924	2.53787	11	60.4648	4.60783	9	54.375	3.3292	8	63.54	3.923	10	59.5667	4.43308	8	73.61	2.90596	10
Ethanol Male	56.9253	2.88549	11	55.5056	5.74607	9	59.1167	3.42623	8	60.6808	2.95309	11	58.4549	10.8051	9	58.3017	4.45826	10

## Sheet: Of Day 1 Stats
	B6			D2			BXD60			BXD71			BXD48A			BXD100
OF Day 1	F (DFm, DFd)	p-value	% of Total Variation	F (DFm, DFd)	p-value	% of Total Variation	F (DFm, DFd)	p-value	% of Total Variation	F (DFm, DFd)	p-value	% of Total Variation	F (DFm, DFd)	p-value	% of Total Variation	F (DFm, DFd)	p-value	% of Total Variation
Day 1- Total Distance Travelled
Bin 1
Interaction	F (1, 41) = 5.241	0.0273	11.33	F (1, 26) = 1.293	0.2659	3.891	F (1, 28) = 0.2722	0.606	0.9107	F (1, 31) = 0.1472	0.7038	0.47	F (1, 30) = 1.418	0.243	4.233	F (1, 33) = 0.001599	0.9683	0.004262
Sex	F (1, 41) = 0.01245	0.9117	0.02691	F (1, 26) = 0.08803	0.769	0.265	F (1, 28) = 1.602	0.216	5.361	F (1, 31) = 0.001487	0.9695	0.004746	F (1, 30) = 1.829	0.1864	5.459	F (1, 33) = 4.512	0.0412	12.02
Treatment	F (1, 41) = 0.08377	0.7737	0.1811	F (1, 26) = 6.191	0.0196	18.64	F (1, 28) = 0.01165	0.9148	0.03899	F (1, 31) = 0.1309	0.72	0.4177	F (1, 30) = 0.3261	0.5722	0.9736	F (1, 33) = 0.0009769	0.9753	0.002604
Bin 2
Interaction	F (1, 41) = 1.758	0.1922	4.092	F (1, 26) = 0.09534	0.76	0.3365	F (1, 28) = 0.1816	0.6732	0.628	F (1, 31) = 0.7933	0.38	2.415	F (1, 30) = 2.279	0.1416	7.038	F (1, 33) = 0.07671	0.7835	0.1788
Sex	F (1, 41) = 0.01724	0.8962	0.04013	F (1, 26) = 0.07546	0.7857	0.2663	F (1, 28) = 0.7181	0.4039	2.483	F (1, 31) = 1.074	0.308	3.271	F (1, 30) = 0.002511	0.9604	0.007754	F (1, 33) = 0.009539	0.9228	0.02223
Treatment	F (1, 41) = 0.2889	0.5939	0.6723	F (1, 26) = 2.248	0.1458	7.933	F (1, 28) = 0.02695	0.8708	0.09316	F (1, 31) = 0.002700	0.9589	0.00822	F (1, 30) = 0.05017	0.8243	0.1549	F (1, 33) = 9.786	0.0037	22.8
Bin 3
Interaction	F (1, 41) = 1.855	0.1806	4.327	F (1, 26) = 0.5477	0.4659	1.986	F (1, 28) = 0.1963	0.6612	0.675	F (1, 31) = 0.5037	0.4832	1.579	F (1, 30) = 0.9080	0.3483	2.775	F (1, 33) = 0.5728	0.4545	1.616
Sex	F (1, 41) = 0.002106	0.9636	0.004911	F (1, 26) = 1.049	0.3151	3.804	F (1, 28) = 0.1139	0.7382	0.3918	F (1, 31) = 0.3197	0.5759	1.002	F (1, 30) = 0.04788	0.8283	0.1464	F (1, 33) = 0.1801	0.6741	0.5079
Treatment	F (1, 41) = 0.05123	0.8221	0.1195	F (1, 26) = 0.05812	0.8114	0.2107	F (1, 28) = 0.7666	0.3887	2.636	F (1, 31) = 0.2070	0.6523	0.6489	F (1, 30) = 1.609	0.2143	4.919	F (1, 33) = 1.602	0.2145	4.518
Total
Interaction	F (1, 41) = 3.839	0.0569	8.548	F (1, 26) = 0.07918	0.7806	0.2785	F (1, 28) = 0.002837	0.9579	0.009864	F (1, 31) = 0.5713	0.4555	1.791	F (1, 30) = 2.756	0.1073	8.29	F (1, 33) = 0.1914	0.6646	0.5089
Sex	F (1, 41) = 0.006520	0.936	0.01452	F (1, 26) = 0.3801	0.5429	1.337	F (1, 28) = 0.6998	0.4099	2.433	F (1, 31) = 0.3447	0.5614	1.08	F (1, 30) = 0.3688	0.5482	1.11	F (1, 33) = 1.233	0.2749	3.278
Treatment	F (1, 41) = 0.1660	0.6858	0.3695	F (1, 26) = 2.096	0.1596	7.372	F (1, 28) = 0.05795	0.8115	0.2015	F (1, 31) = 0.0003736	0.9847	0.001171	F (1, 30) = 0.05838	0.8107	0.1756	F (1, 33) = 3.013	0.0919	8.011
Day 1- Time in Center
Bin 1
Interaction	F (1, 41) = 0.2112	0.6483	0.5008	F (1, 26) = 0.6052	0.4436	2.187	F (1, 28) = 0.05249	0.8204	0.1768	F (1, 31) = 3.528	0.0698	8.702	F (1, 30) = 3.922	0.0569	11.12	F (1, 33) = 5.005	0.0321	12.43
Sex	F (1, 41) = 0.9813	0.3277	2.327	F (1, 26) = 0.9420	0.3407	3.404	F (1, 28) = 1.429	0.2419	4.813	F (1, 31) = 0.4608	0.5023	1.137	F (1, 30) = 1.249	0.2727	3.541	F (1, 33) = 2.333	0.1362	5.796
Treatment	F (1, 41) = 0.01386	0.9068	0.03287	F (1, 26) = 0.1968	0.661	0.7111	F (1, 28) = 0.2138	0.6474	0.7198	F (1, 31) = 4.231	0.0482	10.44	F (1, 30) = 0.03593	0.8509	0.1019	F (1, 33) = 0.09779	0.7565	0.2429
Bin 2
Interaction	F (1, 41) = 0.2542	0.6169	0.5624	F (1, 26) = 0.4783	0.4953	1.804	F (1, 28) = 0.4829	0.4928	1.503	F (1, 31) = 1.727	0.1984	5.024	F (1, 30) = 1.808	0.1888	4.532	F (1, 33) = 0.03026	0.863	0.08966
Sex	F (1, 41) = 0.01526	0.9023	0.03376	F (1, 26) = 0.02575	0.8737	0.09715	F (1, 28) = 2.380	0.1341	7.407	F (1, 31) = 0.8165	0.3732	2.375	F (1, 30) = 5.809	0.0223	14.56	F (1, 33) = 0.2150	0.6459	0.6372
Treatment	F (1, 41) = 3.763	0.0593	8.327	F (1, 26) = 0.02483	0.876	0.09365	F (1, 28) = 1.275	0.2684	3.968	F (1, 31) = 1.013	0.3219	2.948	F (1, 30) = 2.040	0.1635	5.114	F (1, 33) = 0.5153	0.4779	1.527
Bin 3
Interaction	F (1, 41) = 0.2015	0.6558	0.4835	F (1, 26) = 0.03668	0.8496	0.1357	F (1, 28) = 0.0003526	0.9852	0.00121	F (1, 31) = 0.1578	0.694	0.4338	F (1, 30) = 0.07998	0.7793	0.2349	F (1, 33) = 1.685	0.2033	4.566
Sex	F (1, 41) = 0.4218	0.5197	1.012	F (1, 26) = 0.2046	0.6548	0.7569	F (1, 28) = 0.08396	0.7741	0.288	F (1, 31) = 1.124	0.2972	3.091	F (1, 30) = 3.897	0.0576	11.45	F (1, 33) = 1.910	0.1762	5.177
Treatment	F (1, 41) = 0.1000	0.7534	0.24	F (1, 26) = 0.8393	0.368	3.106	F (1, 28) = 1.067	0.3105	3.659	F (1, 31) = 3.664	0.0649	10.07	F (1, 30) = 0.05707	0.8128	0.1677	F (1, 33) = 0.1504	0.7006	0.4077
Total
Interaction	F (1, 41) = 0.05851	0.8101	0.1381	F (1, 26) = 0.6042	0.444	2.217	F (1, 28) = 0.1662	0.6866	0.5538	F (1, 31) = 0.6885	0.413	1.774	F (1, 30) = 1.660	0.2075	4.448	F (1, 33) = 3.169	0.0842	8.663
Sex	F (1, 41) = 0.5932	0.4456	1.401	F (1, 26) = 0.4077	0.5287	1.496	F (1, 28) = 0.6756	0.4181	2.251	F (1, 31) = 1.186	0.2846	3.056	F (1, 30) = 5.574	0.0249	14.94	F (1, 33) = 0.3459	0.5605	0.9454
Treatment	F (1, 41) = 0.7668	0.3863	1.81	F (1, 26) = 0.3032	0.5866	1.113	F (1, 28) = 1.164	0.2898	3.88	F (1, 31) = 5.138	0.0305	13.24	F (1, 30) = 0.1388	0.7121	0.3718	F (1, 33) = 0.1006	0.7531	0.2751
Day 1- Time in Edge
Bin 1
Interaction	F (1, 41) = 0.1931	0.6627	0.4676	F (1, 26) = 1.428	0.243	4.825	F (1, 28) = 0.4864	0.4913	1.664	F (1, 31) = 0.2550	0.6171	0.7542	F (1, 30) = 0.1760	0.6779	0.481	F (1, 33) = 1.065	0.3095	3.074
Sex	F (1, 41) = 0.05231	0.8202	0.1267	F (1, 26) = 0.02034	0.8877	0.06875	F (1, 28) = 0.5632	0.4592	1.927	F (1, 31) = 1.060	0.3113	3.134	F (1, 30) = 2.446	0.1283	6.687	F (1, 33) = 0.1943	0.6622	0.5607
Treatment	F (1, 41) = 0.04303	0.8367	0.1042	F (1, 26) = 2.349	0.1375	7.938	F (1, 28) = 0.1740	0.6797	0.5955	F (1, 31) = 1.332	0.2572	3.941	F (1, 30) = 4.042	0.0535	11.05	F (1, 33) = 0.3968	0.5331	1.145
Bin 2
Interaction	F (1, 41) = 0.02885	0.866	0.06312	F (1, 26) = 0.2972	0.5903	1.056	F (1, 28) = 0.04407	0.8352	0.1462	F (1, 31) = 1.954	0.1721	5.632	F (1, 30) = 1.801	0.1897	4.565	F (1, 33) = 0.001661	0.9677	0.004879
Sex	F (1, 41) = 0.7029	0.4067	1.538	F (1, 26) = 0.6214	0.4376	2.209	F (1, 28) = 1.531	0.2262	5.08	F (1, 31) = 0.7236	0.4015	2.086	F (1, 30) = 5.965	0.0207	15.12	F (1, 33) = 0.2828	0.5984	0.8306
Treatment	F (1, 41) = 3.975	0.0528	8.699	F (1, 26) = 1.286	0.2672	4.57	F (1, 28) = 0.5633	0.4592	1.869	F (1, 31) = 1.257	0.2709	3.623	F (1, 30) = 1.472	0.2346	3.731	F (1, 33) = 0.7885	0.381	2.316
Bin 3
Interaction	F (1, 41) = 0.6697	0.4179	1.578	F (1, 26) = 0.08878	0.7681	0.3348	F (1, 28) = 0.007986	0.9294	0.02727	F (1, 31) = 0.1515	0.6998	0.4098	F (1, 30) = 0.05388	0.818	0.1689	F (1, 33) = 1.424	0.2413	3.885
Sex	F (1, 41) = 0.2240	0.6385	0.5277	F (1, 26) = 0.06592	0.7994	0.2486	F (1, 28) = 0.1635	0.689	0.5584	F (1, 31) = 2.789	0.105	7.545	F (1, 30) = 1.832	0.186	5.744	F (1, 33) = 2.124	0.1545	5.796
Treatment	F (1, 41) = 0.6665	0.419	1.57	F (1, 26) = 0.3691	0.5488	1.392	F (1, 28) = 1.116	0.2998	3.811	F (1, 31) = 2.631	0.1149	7.117	F (1, 30) = 0.005696	0.9403	0.01786	F (1, 33) = 0.02073	0.8864	0.05658
Total
Interaction	F (1, 41) = 0.2561	0.6155	0.6097	F (1, 26) = 0.5598	0.461	1.921	F (1, 28) = 0.3361	0.5667	1.15	F (1, 31) = 0.001297	0.9715	0.003881	F (1, 30) = 0.003851	0.9509	0.00972	F (1, 33) = 1.455	0.2363	4.134
Sex	F (1, 41) = 0.02516	0.8747	0.05991	F (1, 26) = 0.1104	0.7423	0.3791	F (1, 28) = 0.2627	0.6123	0.8987	F (1, 31) = 0.0003736	0.9847	0.001118	F (1, 30) = 5.281	0.0287	13.33	F (1, 33) = 0.05875	0.81	0.1669
Treatment	F (1, 41) = 0.7828	0.3815	1.864	F (1, 26) = 2.631	0.1169	9.03	F (1, 28) = 0.6300	0.434	2.155	F (1, 31) = 2.370	0.1338	7.094	F (1, 30) = 4.300	0.0468	10.85	F (1, 33) = 0.6630	0.4213	1.883
Day 1- Number of Entries to Center
Bin 1
Interaction	F (1, 41) = 1.909	0.1746	4.315	F (1, 26) = 0.4171	0.524	1.447	F (1, 28) = 1.062	0.3116	3.614	F (1, 31) = 0.2205	0.6419	0.688	F (1, 30) = 0.1333	0.7176	0.421	F (1, 33) = 7.995	0.0079	18.85
Sex	F (1, 41) = 0.09925	0.7543	0.2243	F (1, 26) = 1.142	0.2951	3.962	F (1, 28) = 0.03511	0.8527	0.1195	F (1, 31) = 0.1280	0.723	0.3993	F (1, 30) = 1.026	0.3191	3.242	F (1, 33) = 1.249	0.2718	2.945
Treatment	F (1, 41) = 1.482	0.2304	3.351	F (1, 26) = 1.407	0.2464	4.881	F (1, 28) = 0.2902	0.5944	0.9874	F (1, 31) = 0.5837	0.4507	1.821	F (1, 30) = 0.5332	0.4709	1.684	F (1, 33) = 0.01078	0.9179	0.02541
Bin 2
Interaction	F (1, 41) = 0.9916	0.3252	2.147	F (1, 26) = 0.08196	0.7769	0.3009	F (1, 28) = 0.0002282	0.9881	0.0008039	F (1, 31) = 1.832	0.1856	5.533	F (1, 30) = 2.611	0.1166	7.32	F (1, 33) = 0.1134	0.7384	0.3403
Sex	F (1, 41) = 0.003679	0.9519	0.007968	F (1, 26) = 0.3047	0.5857	1.118	F (1, 28) = 0.2796	0.6011	0.9848	F (1, 31) = 0.07220	0.7899	0.218	F (1, 30) = 1.901	0.1781	5.329	F (1, 33) = 0.1623	0.6897	0.4869
Treatment	F (1, 41) = 4.443	0.0412	9.622	F (1, 26) = 0.8947	0.3529	3.285	F (1, 28) = 0.1105	0.7421	0.3891	F (1, 31) = 0.3701	0.5474	1.117	F (1, 30) = 0.9621	0.3345	2.697	F (1, 33) = 0.04191	0.839	0.1257
Bin 3
Interaction	F (1, 41) = 0.7091	0.4046	1.662	F (1, 26) = 0.009739	0.9221	0.03713	F (1, 28) = 0.07110	0.7917	0.2366	F (1, 31) = 5.215e-006	0.9982	1.575e-05	F (1, 30) = 1.945	0.1734	5.941	F (1, 33) = 1.671	0.2051	4.629
Sex	F (1, 41) = 0.4611	0.5009	1.08	F (1, 26) = 0.1147	0.7375	0.4374	F (1, 28) = 1.335	0.2577	4.444	F (1, 31) = 0.5441	0.4663	1.643	F (1, 30) = 0.7783	0.3847	2.378	F (1, 33) = 1.343	0.2549	3.719
Treatment	F (1, 41) = 0.5312	0.4702	1.245	F (1, 26) = 0.08452	0.7736	0.3222	F (1, 28) = 0.6399	0.4305	2.13	F (1, 31) = 1.470	0.2344	4.441	F (1, 30) = 0.03491	0.853	0.1066	F (1, 33) = 0.03271	0.8576	0.09059
Total
Interaction	F (1, 41) = 1.787	0.1887	3.961	F (1, 26) = 0.006742	0.9352	0.02511	F (1, 28) = 0.1695	0.6837	0.5824	F (1, 31) = 0.1335	0.7174	0.4144	F (1, 30) = 1.494	0.2311	0.2311	F (1, 33) = 1.387	0.2473	3.979
Sex	F (1, 41) = 0.004417	0.9473	0.009792	F (1, 26) = 0.4672	0.5003	1.74	F (1, 28) = 0.5491	0.4649	1.887	F (1, 31) = 0.04220	0.8386	0.1311	F (1, 30) = 0.3794	0.5426	0.5426	F (1, 33) = 0.4119	0.5255	1.181
Treatment	F (1, 41) = 2.576	0.1161	5.711	F (1, 26) = 0.4190	0.5231	1.561	F (1, 28) = 0.3813	0.5419	1.31	F (1, 31) = 1.091	0.3043	3.389	F (1, 30) = 0.3794	0.5426	0.5426	F (1, 33) = 0.04398	0.8352	0.1261
Day 1- Number of Entries to Edge
Bin 1
Interaction	F (1, 41) = 2.808	0.1014	6.056	F (1, 26) = 0.3122	0.5811	1.077	F (1, 28) = 0.9623	0.335	3.314	F (1, 31) = 0.04095	0.841	0.1313	F (1, 30) = 0.001717	0.9672	0.005226	F (1, 33) = 1.411	0.2434	3.619
Sex	F (1, 41) = 0.3805	0.5408	0.8207	F (1, 26) = 0.6693	0.4207	2.308	F (1, 28) = 0.02721	0.8702	0.0937	F (1, 31) = 0.01594	0.9004	0.05108	F (1, 30) = 2.808	0.1042	8.546	F (1, 33) = 4.290	0.0462	11.01
Treatment	F (1, 41) = 2.605	0.1142	5.62	F (1, 26) = 2.187	0.1512	7.542	F (1, 28) = 0.04710	0.8298	0.1622	F (1, 31) = 0.1535	0.6979	0.4921	F (1, 30) = 0.05195	0.8212	0.1581	F (1, 33) = 0.09260	0.7628	0.2375
Bin 2
Interaction	F (1, 41) = 1.531	0.223	3.334	F (1, 26) = 0.01821	0.8937	0.06783	F (1, 28) = 0.07010	0.7931	0.2428	F (1, 31) = 0.8401	0.3665	2.588	F (1, 30) = 1.853	0.1835	5.466	F (1, 33) = 0.01643	0.8988	0.04926
Sex	F (1, 41) = 0.4638	0.4997	1.01	F (1, 26) = 0.6065	0.4431	2.259	F (1, 28) = 0.6909	0.4129	2.393	F (1, 31) = 0.1769	0.677	0.545	F (1, 30) = 2.037	0.1638	6.008	F (1, 33) = 0.1009	0.7527	0.3025
Treatment	F (1, 41) = 3.320	0.0757	7.228	F (1, 26) = 0.2669	0.6098	0.9943	F (1, 28) = 0.1065	0.7466	0.3689	F (1, 31) = 0.5621	0.4591	1.732	F (1, 30) = 0.04043	0.842	0.1192	F (1, 33) = 0.2351	0.631	0.7048
Bin 3
Interaction	F (1, 41) = 1.759	0.192	4.01	F (1, 26) = 0.1200	0.7319	0.4531	F (1, 28) = 0.3771	0.5441	1.286	F (1, 31) = 0.04811	0.8278	0.1345	F (1, 30) = 0.4795	0.494	1.513	F (1, 33) = 0.01466	0.9044	0.04247
Sex	F (1, 41) = 0.0001104	0.9917	0.0002516	F (1, 26) = 0.3537	0.5572	1.336	F (1, 28) = 0.02039	0.8875	0.06957	F (1, 31) = 4.032	0.0534	11.27	F (1, 30) = 1.215	0.2791	3.833	F (1, 33) = 1.117	0.2983	3.235
Treatment	F (1, 41) = 1.300	0.2609	2.963	F (1, 26) = 0.02259	0.8817	0.08532	F (1, 28) = 0.9154	0.3469	3.123	F (1, 31) = 0.5916	0.4476	1.653	F (1, 30) = 0.004992	0.9441	0.01575	F (1, 33) = 0.4218	0.5205	1.222
Total
Interaction	F (1, 41) = 2.893	0.0966	6.159	F (1, 26) = 0.001742	0.967	0.006459	F (1, 28) = 0.1788	0.6756	0.6254	F (1, 31) = 0.3259	0.5722	0.9911	F (1, 30) = 1.183	0.2853	3.759	F (1, 33) = 0.1124	0.7395	0.3231
Sex	F (1, 41) = 0.2883	0.5942	0.6139	F (1, 26) = 0.6708	0.4202	2.488	F (1, 28) = 0.2225	0.6408	0.778	F (1, 31) = 0.9724	0.3317	2.957	F (1, 30) = 0.3032	0.5859	0.963	F (1, 33) = 1.652	0.2076	4.748
Treatment	F (1, 41) = 3.261	0.0783	6.943	F (1, 26) = 0.3475	0.5606	1.289	F (1, 28) = 0.1928	0.6639	0.6744	F (1, 31) = 0.6019	0.4437	1.83	F (1, 30) = 0.001537	0.969	0.004882	F (1, 33) = 0.000	>0.9999	0
Day 1- Number of Line Crossings
Bin 1
Interaction	F (1, 41) = 3.089	0.0863	6.623	F (1, 26) = 0.1182	0.7338	0.4019	F (1, 28) = 1.057	0.3126	3.612	F (1, 31) = 0.02040	0.8874	0.06517	F (1, 30) = 0.1841	0.671	0.5541	F (1, 33) = 4.834	0.035	12.27
Sex	F (1, 41) = 0.1221	0.7286	0.2618	F (1, 26) = 0.3260	0.5729	1.109	F (1, 28) = 0.06034	0.8078	0.2061	F (1, 31) = 8.425e-005	0.9927	0.0002692	F (1, 30) = 2.219	0.1467	6.68	F (1, 33) = 1.415	0.2428	3.591
Treatment	F (1, 41) = 2.862	0.0983	6.135	F (1, 26) = 3.106	0.0898	10.57	F (1, 28) = 0.1631	0.6894	0.557	F (1, 31) = 0.2957	0.5905	0.9446	F (1, 30) = 0.8642	0.36	2.601	F (1, 33) = 0.0001444	0.9905	0.0003664
Bin 2
Interaction	F (1, 41) = 0.7528	0.3906	1.629	F (1, 26) = 0.1555	0.6965	0.5759	F (1, 28) = 0.05432	0.8174	0.1884	F (1, 31) = 1.121	0.2978	3.436	F (1, 30) = 0.5685	0.4567	1.593	F (1, 33) = 0.2702	0.6067	0.7668
Sex	F (1, 41) = 0.1051	0.7474	0.2275	F (1, 26) = 0.6536	0.4262	2.421	F (1, 28) = 0.7447	0.3955	2.583	F (1, 31) = 0.4577	0.5037	1.402	F (1, 30) = 4.902	0.0346	13.73	F (1, 33) = 0.07089	0.7917	0.2012
Treatment	F (1, 41) = 4.632	0.0373	10.02	F (1, 26) = 0.2516	0.6201	0.9319	F (1, 28) = 0.03337	0.8564	0.1157	F (1, 31) = 0.009226	0.9241	0.02827	F (1, 30) = 0.2644	0.6109	0.7407	F (1, 33) = 1.949	0.172	5.53
Bin 3
Interaction	F (1, 41) = 2.668	0.11	5.88	F (1, 26) = 0.05695	0.8132	0.213	F (1, 28) = 0.04516	0.8332	0.1582	F (1, 31) = 0.5189	0.4767	1.508	F (1, 30) = 1.357	0.2532	4.251	F (1, 33) = 0.2251	0.6383	0.6554
Sex	F (1, 41) = 0.1127	0.7388	0.2484	F (1, 26) = 0.6512	0.427	2.435	F (1, 28) = 0.01285	0.9106	0.04499	F (1, 31) = 2.203	0.1478	6.403	F (1, 30) = 0.4520	0.5065	1.416	F (1, 33) = 0.6266	0.4343	1.824
Treatment	F (1, 41) = 1.831	0.1834	4.034	F (1, 26) = 0.04037	0.8423	0.1509	F (1, 28) = 0.4918	0.4889	1.723	F (1, 31) = 0.6737	0.418	1.958	F (1, 30) = 0.1695	0.6835	0.5309	F (1, 33) = 0.5269	0.473	1.534
Total
Interaction	F (1, 41) = 3.006	0.0905	6.28	F (1, 26) = 0.02952	0.8649	0.1087	F (1, 28) = 0.1009	0.7531	0.3531	F (1, 31) = 0.6468	0.4274	1.98	F (1, 30) = 0.4933	0.4879	1.594	F (1, 33) = 0.3903	0.5365	1.151
Sex	F (1, 41) = 0.03162	0.8597	0.06607	F (1, 26) = 0.7292	0.401	2.686	F (1, 28) = 0.2477	0.6226	0.8665	F (1, 31) = 0.7079	0.4066	2.168	F (1, 30) = 0.4536	0.5058	1.466	F (1, 33) = 0.4233	0.5198	1.249
Treatment	F (1, 41) = 4.307	0.0443	8.999	F (1, 26) = 0.4547	0.5061	1.675	F (1, 28) = 0.2316	0.6341	0.8105	F (1, 31) = 0.3399	0.5641	1.041	F (1, 30) = 0.0005313	0.9818	0.001717	F (1, 33) = 0.04988	0.8246	0.1471

## Sheet: Of Day 1 Means
	B6			D2			BXD60			BXD71			BXD48A			BXD100
OF Day 1	Mean	SEM	N	Mean	SEM	N	Mean	SEM	N	Mean	SEM	N	Mean	SEM	N	Mean	SEM	N
Day 1- Total Distance Travelled
Bin 1
Control Female	7.55396	0.49777	12	4.17671	1.11405	7	6.44252	0.729682	8	6.82236	0.460442	7	5.31271	0.622194	8	3.41033	0.462613	9
Ethanol Female	8.62692	0.639639	12	7.9279	1.35935	7	6.03758	0.972674	8	6.80519	0.749798	8	4.06875	0.891102	8	3.44878	0.526726	9
Control Male	8.84205	0.54485	10	5.04617	0.60895	7	4.69313	0.84929	8	6.4922	0.809616	10	3.51717	0.34388	9	4.57811	0.406278	9
Ethanol Male	7.45855	0.410902	11	6.44439	0.920762	9	5.30938	1.27741	8	7.07505	0.834314	10	3.95474	0.849891	9	4.5734	0.678519	10
Bin 2
Control Female	6.37737	0.534246	12	7.16857	1.05657	7	8.47523	0.57569	8	9.46271	0.613478	7	6.856	0.597634	8	4.89594	0.366193	9
Ethanol Female	6.75621	0.514878	12	8.8371	0.935033	7	8.69225	0.973337	8	8.99023	0.577672	8	6.03508	0.757376	8	6.14072	0.491467	9
Control Male	7.0775	0.441776	10	7.20002	0.512419	7	8.12637	0.731445	8	8.377	0.467689	10	5.92406	0.334389	9	4.73239	0.340249	9
Ethanol Male	6.18226	0.3769	11	8.29867	0.982269	9	7.63744	0.964263	8	8.90803	0.576749	10	7.03102	0.776714	9	6.219	0.501968	10
Bin 3
Control Female	5.58101	0.483817	12	8.48114	1.32461	7	7.66715	0.503093	8	9.43136	0.868926	7	5.94333	0.409187	8	5.15706	0.406308	9
Ethanol Female	6.094	0.520186	12	7.50164	0.828007	7	8.46529	0.797008	8	8.71354	0.725216	8	6.08944	0.542991	8	5.44644	0.615836	9
Control Male	6.1755	0.375538	10	6.71979	0.792766	7	8.13963	0.416099	8	8.6455	0.456586	10	5.60367	0.45359	9	4.96789	0.720346	9
Ethanol Male	5.45806	0.360005	11	7.21794	0.936621	9	8.40144	0.635717	8	8.80247	0.480065	10	6.63161	0.436372	9	6.1184	0.494703	10
Total
Control Female	19.5123	1.26906	12	19.8264	3.08293	7	22.5849	1.28747	8	25.7164	1.29334	7	18.112	1.47325	8	13.4633	1.09246	9
Ethanol Female	21.4771	1.5717	12	24.2666	2.72245	7	23.1951	2.57833	8	24.509	1.79878	8	16.1933	1.70555	8	15.0359	1.30495	9
Control Male	22.0951	1.1935	10	18.966	1.60433	7	20.9591	1.65345	8	23.5147	1.60901	10	15.0449	0.678131	9	14.2784	0.953242	9
Ethanol Male	19.0989	0.787011	11	21.961	2.50587	9	21.3483	2.48866	8	24.7856	1.59146	10	17.6174	1.43118	9	16.9108	1.38626	10
Day 1- Time in Center
Bin 1
Control Female	6.5375	1.17228	12	15.6857	13.4603	7	13.7479	4.0522	8	13.8071	5.02737	7	4.6625	1.87259	8	16.0833	4.7574	9
Ethanol Female	7.45972	1.80551	12	7.61667	2.24232	7	7.63333	3.9554	8	12.85	4.55757	8	29.9333	8.77297	8	7.60556	3.12455	9
Control Male	10.45	3.33856	10	4.13571	2.1752	7	22.2937	9.7567	8	27.505	7.48417	10	48.3778	23.7693	9	3.56667	1.24116	9
Ethanol Male	8.89242	3.95847	11	6.34444	2.32435	9	20.2312	13.6215	8	6.425	1.94202	10	17.7574	8.6759	9	9.965	3.2039	10
Bin 2
Control Female	10.5319	2.17604	12	8.05714	4.0751	7	15.5729	2.88814	8	17.6071	3.8356	7	8.43125	2.01931	8	9.92222	3.02572	9
Ethanol Female	6.65	0.994319	12	5.97619	2.03473	7	10.9792	2.28099	8	10.275	1.20649	8	8.96875	1.42567	8	11.5333	3.25907	9
Control Male	9.535	1.77762	10	5.96905	1.62177	7	9.9375	2.26827	8	16.31	2.28902	10	15.2722	3.19173	9	8.03333	1.24931	9
Ethanol Male	7.25455	1.03201	11	7.27778	1.56085	9	8.84375	2.5842	8	17.2817	4.04771	10	33.0778	11.4267	9	10.675	3.55379	10
Bin 3
Control Female	6.03194	1.31757	12	8.97857	2.29891	7	13.5833	2.40375	8	15.3571	3.02801	7	9.475	1.62799	8	9.46667	2.04771	9
Ethanol Female	6.21528	1.09981	12	6.81429	1.68374	7	10.7146	3.06714	8	11.8	2.1055	8	9.6	1.69415	8	7.54444	2.14637	9
Control Male	7.55	1.49486	10	9.4881	2.52418	7	14.4563	3.68725	8	18.775	2.34653	10	15.9	3.04956	9	9.64444	1.82993	9
Ethanol Male	6.49242	1.61279	11	8.07222	1.32861	9	11.4812	1.79861	8	13.355	1.9109	10	14.4148	3.87405	9	13.205	2.31912	10
Total
Control Female	23.1014	4.38308	12	32.7214	17.9131	7	42.9042	5.92908	8	46.7714	9.9969	7	22.5688	5.00274	8	35.4722	7.04147	9
Ethanol Female	20.325	2.7953	12	20.4071	4.18439	7	29.3271	4.0988	8	34.925	6.09899	8	48.5021	9.93571	8	26.6833	6.53093	9
Control Male	27.535	5.11733	10	19.5929	4.80597	7	46.6875	11.1373	8	62.59	9.85281	10	79.55	24.2936	9	21.2444	3.42502	9
Ethanol Male	22.6394	5.11427	11	21.6944	4.39115	9	40.5562	12.5542	8	37.0617	5.77103	10	65.25	13.1915	9	33.845	6.24322	10
Day 1- Time in Edge
Bin 1
Control Female	280.626	7.16935	12	243.736	16.1194	7	261.669	15.2437	8	253.414	8.4878	7	275.721	6.05218	8	250.222	10.5247	9
Ethanol Female	279.106	6.92302	12	280.174	5.68591	7	257.454	13.039	8	258.702	4.56498	8	221.552	21.6776	8	255.3	13.7271	9
Control Male	279.245	5.3848	10	257.793	19.8774	7	239.894	16.7465	8	257.685	8.43173	10	231.506	23.8725	9	268.817	13.1975	9
Ethanol Male	283.486	6.02988	11	262.306	8.76486	9	256.656	14.8965	8	271.198	8.81126	10	196.039	28.1094	9	247.835	12.6766	10
Bin 2
Control Female	284.765	2.63123	12	286.336	5.90073	7	278.867	3.54353	8	272.864	6.1907	7	285.465	3.52781	8	284.717	3.75682	9
Ethanol Female	289.475	1.36922	12	289.957	3.31051	7	282.331	3.44112	8	283.227	2.2592	8	286.6	1.93319	8	280.944	3.88875	9
Control Male	283.31	2.65771	10	278.133	10.8159	7	284.087	3.48485	8	275.115	3.21024	10	275.761	3.54112	9	286.711	1.41771	9
Ethanol Male	287.28	1.84883	11	288.461	2.51597	9	286.038	3.93791	8	273.977	4.29891	10	253.233	15.7883	9	283.27	5.55368	10
Bin 3
Control Female	289.078	1.99406	12	284.714	3.54503	7	279.717	3.36184	8	276.836	3.32186	7	284.496	2.27793	8	284.828	3.18122	9
Ethanol Female	289.074	2.22033	12	287.4	2.74434	7	283.938	4.36758	8	280.617	3.60603	8	283.938	3.28427	8	288.878	3.00182	9
Control Male	286.325	2.13535	10	286.36	3.31835	7	278.556	4.26824	8	270.52	2.8116	10	278.844	2.97951	9	284.028	2.59123	9
Ethanol Male	289.809	2.12655	11	287.278	2.32331	9	282.119	2.38236	8	276.688	2.56052	10	279.941	4.85071	9	280.85	3.22058	10
Total
Control Female	854.469	10.32	12	814.786	21.7796	7	820.252	17.8756	8	803.114	14.5456	7	845.681	8.9054	8	819.767	11.4202	9
Ethanol Female	857.654	6.98788	12	857.531	6.85966	7	823.723	13.2319	8	822.546	7.08156	8	792.09	22.926	8	825.122	13.2381	9
Control Male	848.88	7.97994	10	822.286	29.0822	7	802.538	18.6705	8	803.32	10.6965	10	786.111	24.8306	9	839.556	14.805	9
Ethanol Male	860.576	7.50778	11	838.044	8.53888	9	824.812	14.4557	8	821.863	14.2695	10	729.213	37.6592	9	811.955	14.5476	10
Day 1- Number of Entries to Center
Bin 1
Control Female	4.76389	0.655673	12	2.21429	1.04572	7	3.89583	0.815851	8	5.64286	1.56872	7	2.27083	0.637718	8	2.38889	0.439205	9
Ethanol Female	4.90278	0.663013	12	4.07143	1.48175	7	2.5	0.674802	8	5.22917	1.34921	8	3.10417	1.09424	8	1.05556	0.227371	9
Control Male	6.2	1.20922	10	1.78571	0.625425	7	2.8125	0.995245	8	5.8	1.43991	10	1.77778	0.601567	9	1.61111	0.512197	9
Ethanol Male	4	0.864566	11	2.33333	0.777282	9	3.25	1.02644	8	4.06667	1.2083	10	2.05556	0.658515	9	2.85	0.542883	10
Bin 2
Control Female	5.66667	0.622934	12	4.42857	1.45745	7	6.875	1.00778	8	9.35714	1.69633	7	5.08333	0.868313	8	4.11111	0.992254	9
Ethanol Female	5	0.666667	12	5.57143	2.32079	7	6.39583	1.50163	8	6.8125	1.10574	8	4.5625	0.676224	8	4.22222	0.961448	9
Control Male	6.3	0.578312	10	2.97619	0.591416	7	6.125	1.27738	8	7.95	1.05	10	4.88889	0.462314	9	4.05556	0.620509	9
Ethanol Male	4.43939	0.475284	11	5.11111	1.85738	9	5.6875	1.64463	8	8.91667	1.322	10	7.01852	1.1036	9	3.6	0.748331	10
Bin 3
Control Female	4.5	0.592816	12	6.21429	1.53474	7	7.85417	1.07341	8	8.92857	0.862089	7	5.8125	0.509277	8	4.38889	0.861111	9
Ethanol Female	4.56944	0.656314	12	5.92857	1.754	7	6.60417	1.54076	8	7.66667	1.38049	8	4.33333	0.740683	8	3.16667	0.745356	9
Control Male	4.6	0.661648	10	5.85714	1.53419	7	6.1875	0.981696	8	9.7	0.958007	10	5.33333	0.754615	9	4.27778	0.816969	9
Ethanol Male	3.63636	0.521661	11	5.27778	1.17589	9	5.5625	1.00195	8	8.43333	0.866453	10	6.46296	1.37487	9	5.2	0.869866	10
Total
Control Female	14.9306	1.61843	12	12.8571	3.43947	7	18.625	2.24354	8	23.9286	3.35664	7	11.9167	1.37797	8	10.8889	2.13889	9
Ethanol Female	14.4722	1.73385	12	15.5714	5.08315	7	15.5	3.18338	8	19.7083	3.38571	8	12.3571	2.48818	7	8.44444	1.79591	9
Control Male	17.1	2.03825	10	10.619	2.36087	7	15.125	3.01299	8	23.45	2.53689	10	12.8889	1.36874	9	9.94444	1.16799	9
Ethanol Male	12.0758	1.41838	11	12.7222	3.44108	9	14.5	3.55442	8	21.4167	2.74899	10	14.9792	2.76393	8	11.65	1.78115	10
Day 1- Number of Entries to Edge
Bin 1
Control Female	7.11111	0.739213	12	2.92857	0.848167	7	4.8125	0.8125	8	6.85714	1.30345	7	3.97917	0.696816	8	3.05556	0.459804	9
Ethanol Female	7.18056	1.00785	12	5.54762	1.864	7	3.89583	0.976884	8	6.02083	1.17912	8	4.14583	1.44387	8	2.55556	0.385901	9
Control Male	9.7	1.72755	10	2.59524	0.735402	7	3.4375	1.19686	8	6.75	1.27856	10	2.44444	0.647884	9	3.55556	0.653221	9
Ethanol Male	5.98485	1.00062	11	3.77778	1.2886	9	4.875	1.64683	8	6.48333	1.59406	10	2.68519	0.632483	9	4.4	0.674125	10
Bin 2
Control Female	6.79167	0.790336	12	6.92857	1.80749	7	8.39583	1.16067	8	11.6429	1.51859	7	7.04167	1.37536	8	5	0.781736	9
Ethanol Female	6.34722	0.755301	12	7.71429	2.8988	7	8.29167	1.66778	8	8.97917	1.49119	8	5.39583	0.979926	8	5.61111	1.15704	9
Control Male	8.25	0.813941	10	5.04762	0.939798	7	7.4375	2.08189	8	10.85	1.58824	10	7.11111	0.771802	9	5.44444	0.694444	9
Ethanol Male	5.92424	0.658036	11	6.38889	2.00482	9	6.4375	1.72802	8	11.1167	1.59475	10	8.33333	1.05006	9	5.8	1.1907	10
Bin 3
Control Female	5.56944	0.698862	12	8.35714	2.04914	7	9.60417	1.46857	8	10.2143	1.05705	7	6.375	0.464781	8	5.38889	0.963853	9
Ethanol Female	5.70833	0.849868	12	7.45238	2.02521	7	7.3125	1.82233	8	8.89583	1.57704	8	5.625	0.822398	8	4.61111	0.9746	9
Control Male	6.55	0.693021	10	6.64286	1.77856	7	8.5	0.93063	8	12.6	1.29056	10	6.77778	0.764268	9	6.33333	1.2304	9
Ethanol Male	4.71212	0.685009	11	7	1.48137	9	8	1.47297	8	11.8667	1.22671	10	7.38889	1.45985	9	5.8	0.856997	10
Total
Control Female	19.4722	1.87148	12	18.2143	4.01761	7	22.8125	2.69579	8	28.7143	2.83233	7	17.3958	2.05237	8	13.4444	1.91928	9
Ethanol Female	19.2361	2.39839	12	20.7143	6.30368	7	19.5	4.04771	8	23.8958	3.82101	8	15.1667	2.23252	8	12.7778	2.16845	9
Control Male	24.5	2.74975	10	14.2857	3.07032	7	19.375	3.73539	8	30.2	3.38477	10	16.3333	0.931695	9	15.3333	1.54785	9
Ethanol Male	16.6212	1.93794	11	17.1667	4.20235	9	19.3125	4.6329	8	29.4667	3.66278	10	18.4074	2.40532	9	16	2.18072	10
Day 1- Number of Line Crossings
Bin 1
Control Female	12.7083	1.52188	12	5.64286	2.08371	7	11.3125	2.30477	8	14.1429	3.12005	7	6.25	1.49337	8	6.88889	1.04675	9
Ethanol Female	12.8472	1.85177	12	11.381	4.14833	7	7.72917	1.93852	8	11.9167	2.57641	8	9.41667	4.35332	8	4.33333	0.833333	9
Control Male	17.15	3.0469	10	5.02381	1.91707	7	8.125	2.72841	8	13.65	3.28807	10	3.77778	1.11838	9	5.72222	1.16997	9
Ethanol Male	9.87879	2.00958	11	8.88889	2.26963	9	9.6875	2.91997	8	12.35	3.38793	10	4.94444	1.20313	9	8.25	1.41274	10
Bin 2
Control Female	14.1944	1.61026	12	14.0714	3.94671	7	16.8958	2.0366	8	21.7143	3.21984	7	12.8958	2.43139	8	9.22222	1.92049	9
Ethanol Female	12.1944	1.55075	12	14.5238	5.66427	7	17.0625	3.72304	8	17.8958	2.81241	8	9.95833	1.76208	8	13	2.26078	9
Control Male	16.05	1.56427	10	9	1.54689	7	14.8125	3.70802	8	20.45	2.65251	10	16.2778	2.79025	9	9.72222	1.15804	9
Ethanol Male	11.3485	1.45131	11	12.7778	4.28751	9	13.4375	3.46338	8	23.6333	3.92348	10	16.8333	2.03443	9	11.45	2.24654	10
Bin 3
Control Female	10.9861	1.33467	12	16.7143	3.93225	7	18.3333	2.61255	8	22.5714	2.40888	7	14.7083	1.19595	8	12.3889	2.41491	9
Ethanol Female	11.3889	1.69513	12	15.1429	3.76973	7	15.6458	3.82354	8	18.4792	3.2317	8	11.375	1.61151	8	9.44444	2.18016	9
Control Male	12.85	1.35821	10	12.9762	3.75972	7	17.375	2.50491	8	24.6	2.42418	10	13.6667	1.44338	9	13.1667	2.87953	9
Ethanol Male	8.56061	1.22686	11	13.1111	2.9413	9	15.9375	2.62277	8	24.3333	2.38359	10	15.2593	3.2493	9	12.55	2.29426	10
Total
Control Female	37.8889	3.66301	12	36.4286	9.07864	7	46.5417	4.92763	8	58.4286	7.10418	7	33.8542	4.30847	8	28.5	4.02423	9
Ethanol Female	36.4306	4.69519	12	41.0476	12.4837	7	40.4375	8.1632	8	48.2917	7.49615	8	30.75	6.2271	8	26.7778	4.59401	9
Control Male	46.05	5.05934	10	27	5.87164	7	40.3125	8.32752	8	58.7	6.55583	10	33.7222	2.5646	9	28.6111	2.93184	9
Ethanol Male	29.7879	3.53525	11	34.7778	8.18837	9	39.0625	8.55676	8	60.3167	7.46649	10	37.037	4.74551	9	32.25	5.05978	10

## Sheet: Of Day 2 Stats
	B6			D2			BXD60			BXD71			BXD48A			BXD100
OF Day 1	F (DFm, DFd)	p-value	% of Total Variation	F (DFm, DFd)	p-value	% of Total Variation	F (DFm, DFd)	p-value	% of Total Variation	F (DFm, DFd)	p-value	% of Total Variation	F (DFm, DFd)	p-value	% of Total Variation	F (DFm, DFd)	p-value	% of Total Variation
Day 2- Total Distance Travelled
Bin 1
Interaction	F (1, 41) = 4.697	0.0361	9.137	F (1, 26) = 0.2509	0.6206	0.7367	F (1, 28) = 0.5648	0.4586	1.509	F (1, 31) = 0.7063	0.4071	2.033	F (1, 30) = 0.05237	0.8205	0.1674	F (1, 33) = 0.2159	0.6452	0.6095
Sex	F (1, 41) = 0.5979	0.4438	1.163	F (1, 26) = 0.3539	0.5571	1.039	F (1, 28) = 7.852	0.0091	20.98	F (1, 31) = 3.129	0.0867	9.006	F (1, 30) = 0.5597	0.4602	1.789	F (1, 33) = 0.7633	0.3886	2.155
Treatment	F (1, 41) = 4.444	0.0412	8.646	F (1, 26) = 7.463	0.0112	21.91	F (1, 28) = 1.008	0.324	2.693	F (1, 31) = 0.09432	0.7608	0.2715	F (1, 30) = 0.6877	0.4135	2.199	F (1, 33) = 1.442	0.2384	4.07
Bin 2
Interaction	F (1, 41) = 1.667	0.2039	3.787	F (1, 26) = 0.02582	0.8736	0.09461	F (1, 28) = 0.1985	0.6594	0.6789	F (1, 31) = 0.1240	0.7272	0.3818	F (1, 30) = 12.22	0.0015	28.44	F (1, 33) = 0.1871	0.6681	0.4931
Sex	F (1, 41) = 0.4271	0.5171	0.9701	F (1, 26) = 0.1702	0.6833	0.6236	F (1, 28) = 0.8755	0.3574	2.995	F (1, 31) = 1.372	0.2503	4.227	F (1, 30) = 0.6706	0.4193	1.561	F (1, 33) = 0.6373	0.4304	1.679
Treatment	F (1, 41) = 0.7751	0.3838	1.761	F (1, 26) = 1.151	0.2932	4.217	F (1, 28) = 0.1614	0.6909	0.5522	F (1, 31) = 0.01055	0.9189	0.03248	F (1, 30) = 0.004995	0.9441	0.01163	F (1, 33) = 4.098	0.0511	10.8
Bin 3
Interaction	F (1, 41) = 0.1820	0.6719	0.4167	F (1, 26) = 0.8328	0.3698	3.065	F (1, 28) = 2.973	0.0957	9.558	F (1, 31) = 0.6111	0.4403	1.877	F (1, 30) = 0.4903	0.4892	1.516	F (1, 33) = 0.1180	0.7334	0.2963
Sex	F (1, 41) = 2.356	0.1325	5.395	F (1, 26) = 0.2954	0.5914	1.087	F (1, 28) = 0.01840	0.8931	0.05914	F (1, 31) = 0.1661	0.6864	0.5102	F (1, 30) = 0.01320	0.9093	0.04082	F (1, 33) = 6.419	0.0162	16.12
Treatment	F (1, 41) = 0.1149	0.7364	0.263	F (1, 26) = 0.08452	0.7736	0.311	F (1, 28) = 0.1166	0.7353	0.3748	F (1, 31) = 1.030	0.3179	3.164	F (1, 30) = 1.938	0.1741	5.995	F (1, 33) = 0.2624	0.6119	0.6588
Total
Interaction	F (1, 41) = 2.137	0.1514	4.724	F (1, 26) = 0.1910	0.6657	0.6675	F (1, 28) = 1.286	0.2663	4.033	F (1, 31) = 0.5829	0.451	1.741	F (1, 30) = 3.240	0.0819	9.457	F (1, 33) = 0.3123	0.58	0.7827
Sex	F (1, 41) = 0.2655	0.6092	0.5867	F (1, 26) = 0.3272	0.5722	1.143	F (1, 28) = 2.580	0.1194	8.088	F (1, 31) = 1.832	0.1857	5.472	F (1, 30) = 3.764e-005	0.9951	0.0001099	F (1, 33) = 3.742	0.0617	9.378
Treatment	F (1, 41) = 1.582	0.2156	3.496	F (1, 26) = 2.132	0.1562	7.452	F (1, 28) = 0.03357	0.8559	0.1052	F (1, 31) = 0.2681	0.6083	0.801	F (1, 30) = 1.246	0.2732	3.637	F (1, 33) = 2.774	0.1052	6.953
Day 2- Time in Center
Bin 1
Interaction	F (1, 41) = 1.208	0.2782	2.743	F (1, 26) = 1.047	0.3157	3.618	F (1, 28) = 1.691	0.2041	5.099	F (1, 31) = 1.630	0.2113	4.817	F (1, 30) = 0.003497	0.9532	0.01064	F (1, 33) = 1.592	0.2159	4.521
Sex	F (1, 41) = 1.218	0.2762	2.767	F (1, 26) = 1.683	0.2059	5.817	F (1, 28) = 3.256	0.0819	9.82	F (1, 31) = 1.096	0.3032	3.239	F (1, 30) = 2.188	0.1495	6.66	F (1, 33) = 0.5561	0.4611	1.579
Treatment	F (1, 41) = 0.5075	0.4803	1.153	F (1, 26) = 0.3243	0.5739	1.121	F (1, 28) = 0.2106	0.6499	0.6351	F (1, 31) = 0.02783	0.8686	0.08226	F (1, 30) = 0.6684	0.42	2.034	F (1, 33) = 0.02267	0.8812	0.0644
Bin 2
Interaction	F (1, 41) = 1.254	0.2692	2.741	F (1, 26) = 0.1436	0.7078	0.4984	F (1, 28) = 0.02353	0.8792	0.08032	F (1, 31) = 0.1057	0.7472	0.3175	F (1, 30) = 0.7486	0.3938	2.386	F (1, 33) = 0.1917	0.6643	0.5122
Sex	F (1, 41) = 3.591	0.0652	7.846	F (1, 26) = 0.1602	0.6922	0.5561	F (1, 28) = 0.6701	0.4199	2.287	F (1, 31) = 0.08618	0.771	0.2588	F (1, 30) = 0.4688	0.4988	1.494	F (1, 33) = 0.2067	0.6524	0.5521
Treatment	F (1, 41) = 0.07130	0.7908	0.1558	F (1, 26) = 2.505	0.1256	8.694	F (1, 28) = 0.6032	0.4439	2.059	F (1, 31) = 1.951	0.1724	5.859	F (1, 30) = 0.1185	0.733	0.3779	F (1, 33) = 4.043	0.0526	10.8
Bin 3
Interaction	F (1, 41) = 0.3272	0.5704	0.701	F (1, 26) = 0.8050	0.3778	2.911	F (1, 28) = 0.5683	0.4572	1.692	F (1, 31) = 0.1465	0.7045	0.3977	F (1, 30) = 0.03183	0.8596	0.0988	F (1, 33) = 0.9942	0.326	2.597
Sex	F (1, 41) = 4.070	0.0502	8.719	F (1, 26) = 0.7721	0.3876	2.792	F (1, 28) = 4.923	0.0348	14.66	F (1, 31) = 0.1536	0.6978	0.4169	F (1, 30) = 2.141	0.1538	6.644	F (1, 33) = 4.037	0.0527	10.55
Treatment	F (1, 41) = 1.191	0.2815	2.552	F (1, 26) = 0.1602	0.6922	0.5795	F (1, 28) = 0.09010	0.7663	0.2683	F (1, 31) = 5.599	0.0244	15.2	F (1, 30) = 0.04993	0.8247	0.155	F (1, 33) = 0.3769	0.5435	0.9845
Total
Interaction	F (1, 41) = 0.3693	0.5467	0.7814	F (1, 26) = 1.062	0.3122	3.609	F (1, 28) = 0.2517	0.6198	0.8821	F (1, 31) = 0.4081	0.5276	1.171	F (1, 30) = 0.05214	0.8209	0.1604	F (1, 33) = 1.862	0.1816	4.922
Sex	F (1, 41) = 5.494	0.024	11.62	F (1, 26) = 1.501	0.2314	5.101	F (1, 28) = 0.08241	0.7762	0.2888	F (1, 31) = 0.3014	0.5869	0.8645	F (1, 30) = 1.838	0.1853	5.655	F (1, 33) = 1.987	0.168	5.253
Treatment	F (1, 41) = 0.3447	0.5603	0.7294	F (1, 26) = 0.9791	0.3315	3.326	F (1, 28) = 0.2058	0.6536	0.721	F (1, 31) = 3.322	0.078	9.529	F (1, 30) = 0.5890	0.4488	1.812	F (1, 33) = 1.079	0.3066	2.851
Day 2- Time in Edge
Bin 1
Interaction	F (1, 41) = 0.1925	0.6632	0.464	F (1, 26) = 1.250	0.2739	4.329	F (1, 28) = 2.064	0.1619	5.666	F (1, 31) = 0.01854	0.8926	0.05934	F (1, 30) = 2.222	0.1465	5.515	F (1, 33) = 0.01603	0.9	0.04745
Sex	F (1, 41) = 0.008298	0.9279	0.02	F (1, 26) = 1.529	0.2273	5.297	F (1, 28) = 4.481	0.0433	12.3	F (1, 31) = 0.03437	0.8541	0.11	F (1, 30) = 3.915	0.0571	9.716	F (1, 33) = 0.1327	0.7179	0.3928
Treatment	F (1, 41) = 0.3146	0.5779	0.7584	F (1, 26) = 0.2342	0.6325	0.8112	F (1, 28) = 1.889	0.1802	5.185	F (1, 31) = 0.1714	0.6817	0.5485	F (1, 30) = 3.792	0.0609	9.412	F (1, 33) = 0.6491	0.4262	1.921
Bin 2
Interaction	F (1, 41) = 2.065	0.1583	4.39	F (1, 26) = 0.02039	0.8876	0.0718	F (1, 28) = 0.04038	0.8422	0.1403	F (1, 31) = 0.1601	0.6918	0.4734	F (1, 30) = 0.5937	0.447	1.905	F (1, 33) = 0.1099	0.7423	0.2893
Sex	F (1, 41) = 4.128	0.0487	8.773	F (1, 26) = 0.4848	0.4925	1.707	F (1, 28) = 0.4423	0.5114	1.537	F (1, 31) = 0.2358	0.6307	0.6971	F (1, 30) = 0.3697	0.5477	1.187	F (1, 33) = 0.8645	0.3592	2.275
Treatment	F (1, 41) = 0.01846	0.8926	0.03924	F (1, 26) = 1.788	0.1928	6.298	F (1, 28) = 0.2998	0.5883	1.042	F (1, 31) = 2.236	0.145	6.609	F (1, 30) = 0.1578	0.694	0.5064	F (1, 33) = 4.104	0.0509	10.8
Bin 3
Interaction	F (1, 41) = 0.04839	0.827	0.09982	F (1, 26) = 0.8931	0.3533	3.198	F (1, 28) = 1.665	0.2075	4.99	F (1, 31) = 0.08323	0.7749	0.24	F (1, 30) = 0.09812	0.7563	0.3105	F (1, 33) = 0.8548	0.3619	2.241
Sex	F (1, 41) = 6.106	0.0177	12.59	F (1, 26) = 1.125	0.2986	4.028	F (1, 28) = 3.678	0.0654	11.02	F (1, 31) = 0.07203	0.7902	0.2077	F (1, 30) = 1.341	0.2559	4.245	F (1, 33) = 4.006	0.0536	10.5
Treatment	F (1, 41) = 1.190	0.2817	2.455	F (1, 26) = 0.01970	0.8895	0.07053	F (1, 28) = 0.02034	0.8876	0.06096	F (1, 31) = 3.561	0.0686	10.27	F (1, 30) = 0.1745	0.6791	0.5522	F (1, 33) = 0.4022	0.5303	1.055
Total
Interaction	F (1, 41) = 0.08927	0.7666	0.1997	F (1, 26) = 1.176	0.2881	3.997	F (1, 28) = 0.5393	0.4688	1.614	F (1, 31) = 0.0007536	0.9783	0.002333	F (1, 30) = 1.385	0.2484	3.758	F (1, 33) = 0.07665	0.7836	0.2295
Sex	F (1, 41) = 3.135	0.0841	7.015	F (1, 26) = 1.861	0.1842	6.325	F (1, 28) = 4.098	0.0526	12.26	F (1, 31) = 0.0001423	0.9906	0.0004406	F (1, 30) = 2.565	0.1197	6.958	F (1, 33) = 0.3156	0.5781	0.9449
Treatment	F (1, 41) = 0.4087	0.5262	0.9145	F (1, 26) = 0.5244	0.4754	1.782	F (1, 28) = 0.7814	0.3843	2.338	F (1, 31) = 1.283	0.2661	3.971	F (1, 30) = 2.677	0.1122	7.261	F (1, 33) = 0.008698	0.9263	0.02605
Day 2- Number of Entries to Center
Bin 1
Interaction	F (1, 41) = 5.647	0.0222	11.6	F (1, 26) = 0.03279	0.8577	0.09653	F (1, 28) = 0.9118	0.3478	2.644	F (1, 31) = 0.2464	0.6231	0.7634	F (1, 30) = 0.2409	0.6271	0.7502	F (1, 33) = 0.01308	0.9096	0.03928
Sex	F (1, 41) = 0.001128	0.9734	0.002319	F (1, 26) = 3.279	0.0817	9.653	F (1, 28) = 5.378	0.0279	15.59	F (1, 31) = 0.1055	0.7475	0.3269	F (1, 30) = 1.863	0.1825	5.8	F (1, 33) = 0.1358	0.7149	0.4078
Treatment	F (1, 41) = 1.574	0.2167	3.235	F (1, 26) = 5.124	0.0322	15.08	F (1, 28) = 0.2009	0.6575	0.5825	F (1, 31) = 1.014	0.3217	3.142	F (1, 30) = 0.01854	0.8926	0.05773	F (1, 33) = 0.1358	0.7149	0.4078
Bin 2
Interaction	F (1, 41) = 2.652	0.1111	5.904	F (1, 26) = 0.002726	0.9588	0.01012	F (1, 28) = 0.5036	0.4838	1.727	F (1, 31) = 0.02310	0.8802	0.0674	F (1, 30) = 6.089	0.0195	16.57	F (1, 33) = 0.3973	0.5328	1.179
Sex	F (1, 41) = 1.289	0.2629	2.868	F (1, 26) = 0.8932	0.3533	3.316	F (1, 28) = 0.6177	0.4385	2.118	F (1, 31) = 1.756	0.1949	5.123	F (1, 30) = 0.6062	0.4423	1.649	F (1, 33) = 0.004163	0.9489	0.01235
Treatment	F (1, 41) = 0.1669	0.685	0.3716	F (1, 26) = 0.009842	0.9217	0.03655	F (1, 28) = 0.04244	0.8383	0.1455	F (1, 31) = 1.493	0.231	4.355	F (1, 30) = 0.009183	0.9243	0.02499	F (1, 33) = 0.3146	0.5787	0.9334
Bin 3
Interaction	F (1, 41) = 0.3430	0.5613	0.7398	F (1, 26) = 0.06524	0.8004	0.2419	F (1, 28) = 1.851	0.1845	5.897	F (1, 31) = 0.008982	0.9251	0.02701	F (1, 30) = 1.035	0.3171	3.312	F (1, 33) = 0.6501	0.4258	1.602
Sex	F (1, 41) = 4.922	0.0321	10.62	F (1, 26) = 0.8590	0.3625	3.186	F (1, 28) = 1.441	0.24	4.591	F (1, 31) = 0.001268	0.9718	0.003813	F (1, 30) = 0.1668	0.6858	0.5339	F (1, 33) = 6.793	0.0136	16.74
Treatment	F (1, 41) = 0.2441	0.6239	0.5264	F (1, 26) = 0.08953	0.7672	0.332	F (1, 28) = 0.1025	0.7512	0.3265	F (1, 31) = 2.160	0.1517	6.496	F (1, 30) = 0.07698	0.7833	0.2463	F (1, 33) = 0.003164	0.9555	0.007798
Total
Interaction	F (1, 41) = 2.658	0.1107	5.832	F (1, 26) = 0.003383	0.9541	0.01207	F (1, 28) = 1.370	0.2516	4.634	F (1, 31) = 0.006200	0.9377	0.01849	F (1, 30) = 4.205	0.0491	11.74	F (1, 33) = 0.4655	0.4998	1.318
Sex	F (1, 41) = 2.012	0.1636	4.414	F (1, 26) = 1.714	0.2019	6.116	F (1, 28) = 0.1845	0.6709	0.6238	F (1, 31) = 0.3129	0.5799	0.9333	F (1, 30) = 1.607	0.2147	4.487	F (1, 33) = 1.726	0.1979	4.889
Treatment	F (1, 41) = 0.0001125	0.9916	0.0002468	F (1, 26) = 0.4033	0.5309	1.439	F (1, 28) = 0.01390	0.907	0.04701	F (1, 31) = 2.249	0.1438	6.709	F (1, 30) = 0.03150	0.8603	0.08794	F (1, 33) = 0.1079	0.7446	0.3055
Day 2- Number of Entries to Edge
Bin 1
Interaction	F (1, 41) = 4.106	0.0493	8.847	F (1, 26) = 0.4857	0.492	1.391	F (1, 28) = 1.669	0.207	4.812	F (1, 31) = 0.003150	0.9556	0.009772	F (1, 30) = 0.01443	0.9052	0.04632	F (1, 33) = 0.08224	0.7761	0.2477
Sex	F (1, 41) = 0.007137	0.9331	0.01538	F (1, 26) = 2.830	0.1045	8.108	F (1, 28) = 4.932	0.0346	14.22	F (1, 31) = 0.01169	0.9146	0.03625	F (1, 30) = 0.8130	0.3744	2.609	F (1, 33) = 0.03039	0.8627	0.09151
Treatment	F (1, 41) = 0.9948	0.3244	2.143	F (1, 26) = 6.113	0.0203	17.51	F (1, 28) = 0.07605	0.7847	0.2193	F (1, 31) = 1.204	0.2811	3.734	F (1, 30) = 0.3428	0.5626	1.1	F (1, 33) = 0.08224	0.7761	0.2477
Bin 2
Interaction	F (1, 41) = 3.556	0.0664	7.806	F (1, 26) = 0.07514	0.7862	0.2764	F (1, 28) = 0.2664	0.6098	0.9179	F (1, 31) = 0.05819	0.811	0.1743	F (1, 30) = 9.918	0.0037	24.49	F (1, 33) = 0.1486	0.7023	0.4452
Sex	F (1, 41) = 1.095	0.3016	2.403	F (1, 26) = 1.063	0.312	3.912	F (1, 28) = 0.7557	0.3921	2.604	F (1, 31) = 1.272	0.268	3.812	F (1, 30) = 0.5788	0.4527	1.429	F (1, 33) = 0.2390	0.6282	0.7159
Treatment	F (1, 41) = 0.02380	0.8782	0.05224	F (1, 26) = 1.704e-016	>0.9999	6.268e-16	F (1, 28) = 0.0007380	0.9785	0.002543	F (1, 31) = 1.004	0.3242	3.007	F (1, 30) = 0.007966	0.9295	0.01967	F (1, 33) = 0.004565	0.9465	0.01367
Bin 3
Interaction	F (1, 41) = 0.05194	0.8209	0.1098	F (1, 26) = 1.148	0.2938	4.11	F (1, 28) = 3.075	0.0905	9.517	F (1, 31) = 0.07582	0.7849	0.2306	F (1, 30) = 2.001	0.1675	6.075	F (1, 33) = 0.5479	0.4644	1.436
Sex	F (1, 41) = 6.221	0.0167	13.15	F (1, 26) = 0.8237	0.3724	2.949	F (1, 28) = 1.139	0.295	3.526	F (1, 31) = 0.04437	0.8345	0.135	F (1, 30) = 0.9270	0.3433	2.814	F (1, 33) = 4.528	0.0409	11.87
Treatment	F (1, 41) = 0.08246	0.7754	0.1744	F (1, 26) = 0.06355	0.8029	0.2275	F (1, 28) = 0.09299	0.7627	0.2878	F (1, 31) = 1.850	0.1836	5.626	F (1, 30) = 0.03655	0.8497	0.1109	F (1, 33) = 0.002795	0.9582	0.007325
Total
Interaction	F (1, 41) = 2.275	0.1391	5.014	F (1, 26) = 0.04898	0.8266	0.1752	F (1, 28) = 1.896	0.1794	6.284	F (1, 31) = 3.282e-007	0.9995	9.92e-07	F (1, 30) = 4.459	0.0432	12.36	F (1, 33) = 0.01937	0.8901	0.05557
Sex	F (1, 41) = 2.152	0.15	4.743	F (1, 26) = 1.569	0.2214	5.615	F (1, 28) = 0.2416	0.6269	0.8007	F (1, 31) = 0.2981	0.589	0.901	F (1, 30) = 1.542	0.224	4.273	F (1, 33) = 1.817	0.1869	5.212
Treatment	F (1, 41) = 0.01225	0.9124	0.027	F (1, 26) = 0.4356	0.5151	1.559	F (1, 28) = 0.03676	0.8493	0.1218	F (1, 31) = 1.796	0.19	5.428	F (1, 30) = 0.1700	0.683	0.4711	F (1, 33) = 0.02367	0.8787	0.06789
Day 2- Number of Line Crossings
Bin 1
Interaction	F (1, 41) = 2.055	0.1593	4.636	F (1, 26) = 0.2799	0.6013	0.8763	F (1, 28) = 0.5137	0.4795	1.541	F (1, 31) = 0.06146	0.8058	0.1925	F (1, 30) = 0.01115	0.9166	0.03606	F (1, 33) = 0.4350	0.5141	1.3
Sex	F (1, 41) = 0.02899	0.8656	0.06539	F (1, 26) = 2.966	0.0969	9.288	F (1, 28) = 4.829	0.0364	14.48	F (1, 31) = 0.001462	0.9697	0.004579	F (1, 30) = 0.8956	0.3515	2.897	F (1, 33) = 0.0002860	0.9866	0.0008549
Treatment	F (1, 41) = 1.026	0.3171	2.314	F (1, 26) = 3.021	0.094	9.461	F (1, 28) = 0.001551	0.9689	0.004651	F (1, 31) = 0.9105	0.3474	2.852	F (1, 30) = 0.002303	0.962	0.007451	F (1, 33) = 0.01640	0.8989	0.04901
Bin 2
Interaction	F (1, 41) = 3.813	0.0577	8.198	F (1, 26) = 0.08879	0.7681	0.3216	F (1, 28) = 0.4714	0.498	1.622	F (1, 31) = 0.02214	0.8827	0.06617	F (1, 30) = 7.657	0.0096	19.4	F (1, 33) = 0.1032	0.75	0.309
Sex	F (1, 41) = 1.798	0.1874	3.865	F (1, 26) = 1.461	0.2376	5.293	F (1, 28) = 0.5888	0.4493	2.026	F (1, 31) = 0.8449	0.3651	2.525	F (1, 30) = 0.9159	0.3462	2.321	F (1, 33) = 0.1314	0.7193	0.3933
Treatment	F (1, 41) = 0.0003210	0.9858	0.00069	F (1, 26) = 0.0001264	0.9911	0.000458	F (1, 28) = 0.006525	0.9362	0.02245	F (1, 31) = 1.573	0.2191	4.701	F (1, 30) = 0.6117	0.4403	1.55	F (1, 33) = 0.1765	0.6771	0.5284
Bin 3
Interaction	F (1, 41) = 0.02538	0.8742	0.05466	F (1, 26) = 0.4800	0.4946	1.708	F (1, 28) = 4.164	0.0508	12.28	F (1, 31) = 0.1014	0.7523	0.3098	F (1, 30) = 2.030	0.1646	6.246	F (1, 33) = 0.0001706	0.9897	0.0004117
Sex	F (1, 41) = 5.292	0.0266	11.4	F (1, 26) = 1.584	0.2194	5.634	F (1, 28) = 1.361	0.2532	4.012	F (1, 31) = 0.2687	0.6079	0.8207	F (1, 30) = 0.09733	0.7572	0.2995	F (1, 33) = 8.180	0.0073	19.75
Treatment	F (1, 41) = 0.08459	0.7726	0.1822	F (1, 26) = 0.1688	0.6845	0.6006	F (1, 28) = 0.3962	0.5342	1.168	F (1, 31) = 1.497	0.2304	4.572	F (1, 30) = 0.2708	0.6066	0.8334	F (1, 33) = 0.3227	0.5738	0.779
Total
Interaction	F (1, 41) = 1.593	0.214	3.519	F (1, 26) = 0.005463	0.9416	0.01907	F (1, 28) = 2.143	0.1543	7.059	F (1, 31) = 0.01866	0.8922	0.05598	F (1, 30) = 4.508	0.0421	12.41	F (1, 33) = 0.01338	0.9086	0.03669
Sex	F (1, 41) = 2.454	0.1249	5.42	F (1, 26) = 2.401	0.1333	8.382	F (1, 28) = 0.1547	0.6971	0.5095	F (1, 31) = 0.4094	0.527	1.228	F (1, 30) = 1.179	0.2862	3.246	F (1, 33) = 3.207	0.0825	8.792
Treatment	F (1, 41) = 0.1969	0.6596	0.4349	F (1, 26) = 0.3434	0.5629	1.199	F (1, 28) = 0.06314	0.8034	0.208	F (1, 31) = 1.980	0.1693	5.941	F (1, 30) = 0.4461	0.5093	1.228	F (1, 33) = 0.3135	0.5793	0.8595

## Sheet: Of Day 2 Means
	B6			D2			BXD60			BXD71			BXD48A			BXD100
OF Day 2	Mean	SEM	N	Mean	SEM	N	Mean	SEM	N	Mean	SEM	N	Mean	SEM	N	Mean	SEM	N
Day 2- Total Distance Travelled
Bin 1
Control Female	4.40157	0.394429	12	5.56707	0.927612	7	7.19135	1.18898	8	8.686	1.3064	7	4.39054	0.393412	8	2.87956	0.336507	9
Ethanol Female	6.23789	0.549291	12	7.66083	1.06263	7	6.94227	0.866679	8	7.64562	0.589075	8	3.78727	0.711286	8	3.63178	0.656628	9
Control Male	5.0003	0.435686	10	4.53871	0.365348	7	5.16681	1.26311	8	6.3203	0.877189	10	3.83356	0.518229	9	3.48406	0.389713	9
Ethanol Male	4.97492	0.255125	11	7.57267	1.05772	9	3.43375	0.372201	8	6.8038	0.799285	10	3.49122	0.603982	9	3.8165	0.365288	10
Bin 2
Control Female	4.53313	0.520371	12	6.759	0.906666	7	8.54106	0.901395	8	9.47093	1.51996	7	5.76944	0.473921	8	3.26528	0.436601	9
Ethanol Female	5.40874	0.350521	12	8.23795	1.21073	7	9.25119	1.26722	8	9.09137	0.757927	8	4.25521	0.467864	8	4.363	0.431556	9
Control Male	5.31725	0.388559	10	6.45702	0.624254	7	8.13025	0.493397	8	8.1994	0.376237	10	4.586	0.380358	9	3.81522	0.414061	9
Ethanol Male	5.15162	0.286327	11	7.55067	1.51198	9	8.09362	0.384392	8	8.40753	0.68856	10	6.16272	0.447494	9	4.5264	0.486831	10
Bin 3
Control Female	4.31125	0.467309	12	7.45379	1.39573	7	6.50704	0.850316	8	9.15564	1.17232	7	5.74479	0.599484	8	3.99189	0.369881	9
Ethanol Female	4.63197	0.338918	12	6.79479	1.16383	7	8.08671	1.05848	8	7.85152	0.59659	8	4.43929	0.469215	8	4.40194	0.445493	9
Control Male	5.1331	0.505408	10	5.91074	0.566673	7	7.92931	0.539305	8	8.29245	0.458516	10	5.37961	0.778936	9	5.37056	0.40518	9
Ethanol Male	5.09636	0.350744	11	7.18589	0.944369	9	6.87188	0.452475	8	8.12307	0.691552	10	4.94783	0.56243	9	5.4514	0.614546	10
Total
Control Female	13.2459	1.31323	12	19.7799	2.96326	7	22.2395	2.29454	8	27.3126	3.89285	7	15.9048	1.04961	8	10.1367	0.873953	9
Ethanol Female	16.2786	1.11145	12	22.6936	2.8846	7	24.2802	3.03558	8	24.5885	1.63861	8	12.4818	1.27386	8	12.3967	1.14864	9
Control Male	15.4506	1.15053	10	16.9065	1.10948	7	21.2264	1.81564	8	22.8121	1.34927	10	13.7992	1.01671	9	12.6698	0.820927	9
Ethanol Male	15.2229	0.741185	11	22.3092	3.31816	9	18.3992	0.802559	8	23.3344	1.65747	10	14.6018	1.30741	9	13.7943	1.13483	10
Day 2- Time in Center
Bin 1
Control Female	2.15278	0.474199	12	16.0286	13.4028	7	2.73333	0.879619	8	5.57857	2.21902	7	2.95417	0.713418	8	2.97222	1.14637	9
Ethanol Female	3.64306	0.485377	12	5.89524	1.84094	7	3.35208	0.89153	8	2.225	0.317636	8	9.41667	3.19854	8	5.69444	3.28269	9
Control Male	3.965	1.05896	10	1.26429	0.648966	7	2.3625	0.670471	8	5.045	2.35677	10	14.2944	9.41267	9	3.96667	1.74169	9
Ethanol Male	3.64697	1.16299	11	4.15	1.1658	9	1.06875	0.381484	8	7.62333	2.82537	10	19.8852	9.73772	9	1.825	0.691667	10
Bin 2
Control Female	3.64861	0.88363	12	11.85	3.99921	7	12.7688	3.64149	8	11.1357	3.79474	7	15.5146	3.92188	8	6.38333	2.17719	9
Ethanol Female	5.15694	0.742458	12	6.1619	1.74943	7	9.95208	2.68306	8	8.7875	1.41465	8	13.0917	7.853	8	3.82778	1.0298	9
Control Male	8.98	3.14105	10	9.59048	3.26788	7	9.825	2.6531	8	11.205	2.05129	10	8.30556	1.87145	9	7.83333	1.8343	9
Ethanol Male	6.52727	1.83515	11	6.1	2.271	9	7.9375	3.0315	8	7.43167	1.40245	10	13.9315	3.59578	9	3.855	1.26554	10
Bin 3
Control Female	3.1	0.761489	12	8.89286	1.9007	7	6.48958	1.71901	8	14.6286	2.92715	7	9.375	1.85896	8	7.21111	1.33502	9
Ethanol Female	3.94444	0.731544	12	6.33571	2.62345	7	8.9	2.53368	8	8.19792	1.63029	8	11.5396	3.97801	8	8.75556	3.89085	9
Control Male	5.45	1.16981	10	5.39286	1.34587	7	13.2875	2.10307	8	14.65	2.19479	10	18.2167	5.54079	9	19.3278	6.26316	9
Ethanol Male	8.15455	2.92659	11	6.37222	1.79363	9	12.25	2.66885	8	10.01	2.37602	10	18.4593	7.52972	9	12.835	3.17182	10
Total
Control Female	8.90139	1.90494	12	36.7714	17.5149	7	21.9917	3.70366	8	31.3429	7.58561	7	27.8438	5.68374	8	16.5667	3.37182	9
Ethanol Female	12.7444	1.19054	12	18.3929	4.20199	7	22.2042	5.26416	8	19.2104	2.82318	8	34.0479	12.3066	8	18.2778	4.70396	9
Control Male	18.395	4.931	10	16.2476	4.35327	7	25.475	4.41068	8	30.9	4.98458	10	40.8167	12.5803	9	31.1278	8.19527	9
Ethanol Male	18.3288	4.14526	11	16.6222	4.60539	9	21.2563	4.13732	8	25.065	3.85763	10	52.2759	12.8915	9	18.515	3.56584	10
Day 2- Time in Edge
Bin 1
Control Female	289.333	2.9122	12	261.279	17.061	7	275.327	8.30396	8	282.171	3.24983	7	275.167	7.98485	8	270.25	6.82167	9
Ethanol Female	289.006	1.53438	12	277.26	5.86081	7	275.885	9.48085	8	280.894	4.72835	8	269.567	8.06472	8	262.911	10.4761	9
Control Male	290.755	1.90483	10	284.769	5.3686	7	269.231	8.24774	8	281.945	5.21865	10	269.183	8.22302	9	275.556	8.71306	9
Ethanol Male	288.073	3.74818	11	278.444	7.73142	9	244.037	9.71596	8	279.415	4.0263	10	227.022	19.0519	9	265.48	14.4757	10
Bin 2
Control Female	294.128	1.42272	12	282.821	5.73442	7	282.76	4.08974	8	281.121	5.9136	7	279.071	4.32668	8	290.928	2.88294	9
Ethanol Female	291.075	0.993882	12	288.814	3.2324	7	284.106	4.02191	8	284.821	1.94894	8	281.129	9.53416	8	294.494	1.29817	9
Control Male	285.99	4.06251	10	286.219	3.82324	7	284.562	3.52211	8	281.41	3.42353	10	286.672	2.10046	9	288.272	2.20937	9
Ethanol Male	289.68	2.41446	11	291.056	3.1758	9	287.469	3.8722	8	287.813	1.79096	10	280.233	4.19963	9	293.235	1.76035	10
Bin 3
Control Female	294.493	1.31167	12	285.936	2.7998	7	289.398	2.4409	8	277.529	3.95286	7	285.95	1.999	8	289.594	1.91858	9
Ethanol Female	292.536	1.36785	12	288.45	4.49959	7	285.844	3.87384	8	284.717	2.04568	8	281.454	6.01254	8	288.161	4.84621	9
Control Male	289.435	2.3094	10	292.202	1.85177	7	279.462	2.8344	8	277.595	3.15665	10	276.9	5.77996	9	275.15	7.59469	9
Ethanol Male	286.489	3.51847	11	288.811	2.78316	9	283.9	3.06045	8	282.877	3.50574	10	276.257	8.29946	9	282.845	3.82215	10
Total
Control Female	877.954	4.74954	12	830.036	24.2074	7	847.485	9.87311	8	840.821	11.5391	7	840.188	12.7143	8	850.772	7.54851	9
Ethanol Female	872.617	2.74549	12	854.524	9.27751	7	845.835	10.6683	8	850.431	7.15642	8	832.15	19.9434	8	845.567	10.888	9
Control Male	866.18	7.06263	10	863.19	7.41502	7	833.256	11.736	8	840.95	8.80038	10	832.756	12.3308	9	838.978	16.5819	9
Ethanol Male	864.242	7.61877	11	858.311	8.15297	9	815.406	11.7312	8	850.105	5.5365	10	783.513	22.2306	9	841.56	17.5815	10
Day 2- Number of Entries to Center
Bin 1
Control Female	1.95833	0.395218	12	2.14286	0.980247	7	2.29167	0.708333	8	4.35714	1.6283	7	2.08333	0.313392	8	1.22222	0.373712	9
Ethanol Female	3.52778	0.368038	12	4.07143	1.13614	7	2.5625	0.503891	8	2.54167	0.380254	8	1.625	0.691322	8	1.11111	0.686061	9
Control Male	3	0.552771	10	0.857143	0.282722	7	1.5625	0.554507	8	4.15	1.40248	10	2.72222	0.825425	9	1.11111	0.273579	9
Ethanol Male	2.51515	0.423105	11	2.5	0.552771	9	0.8125	0.282487	8	3.53333	0.99963	10	2.98148	0.869779	9	0.9	0.314466	10
Bin 2
Control Female	2.95833	0.618229	12	5.64286	1.66445	7	5.41667	1.31196	8	9.14286	3.31611	7	5.25	0.754615	8	2.5	0.763763	9
Ethanol Female	3.63889	0.327495	12	5.57143	1.49773	7	6.66667	1.79644	8	7.41667	0.942283	8	3.41667	0.816497	8	1.83333	0.440959	9
Control Male	4.5	0.788811	10	4.28571	1.37086	7	5.3125	1.0604	8	7.25	1.23884	10	3.94444	0.626079	9	2.11111	0.361111	9
Ethanol Male	3.36364	0.448239	11	4.05556	1.47065	9	4.625	1.17546	8	5.03333	0.670268	10	5.92593	0.869188	9	2.15	0.577591	10
Bin 3
Control Female	2.5	0.602324	12	5.85714	1.35275	7	4.02083	0.988243	8	7.78571	1.15911	7	5.10417	0.859666	8	2.77778	0.486706	9
Ethanol Female	2.55556	0.409449	12	5.92857	2.49864	7	5.10417	1.22796	8	6.29167	1.19097	8	3.9375	0.907387	8	2.22222	0.472222	9
Control Male	4.2	0.823947	10	3.92857	0.88256	7	6.6875	0.986233	8	7.85	0.963356	10	4.55556	0.738074	9	4.11111	0.861111	9
Ethanol Male	3.54545	0.583481	11	4.83333	1.3994	9	4.9375	0.9375	8	6.15	1.0194	10	5.22222	1.05153	9	4.75	0.946485	10
Total
Control Female	7.41667	1.46228	12	13.6429	3.67215	7	11.7292	2.42424	8	21.2857	5.7049	7	12.4375	1.34921	8	6.5	1.19024	9
Ethanol Female	9.72222	0.951327	12	15.5714	3.9452	7	14.3333	3.37988	8	16.25	1.96169	8	8.97917	2.08605	8	5.16667	1.19606	9
Control Male	11.7	1.91079	10	9.07143	2.02493	7	13.5625	1.84061	8	19.25	3.0288	10	11.2222	1.03451	9	7.33333	1.16964	9
Ethanol Male	9.42424	1.26119	11	11.3889	3.2519	9	10.375	1.94741	8	14.7167	1.79317	10	14.1296	1.62251	9	7.8	1.58675	10
Day 2- Number of Entries to Edge
Bin 1
Control Female	3.52778	0.474888	12	3.07143	0.710705	7	3.66667	0.908514	8	6.71429	1.78571	7	3.72917	0.414204	8	2.27778	0.472222	9
Ethanol Female	5.04167	0.457874	12	5.90476	1.55109	7	4.39583	0.616359	8	4.8125	0.432368	8	3.08333	0.978945	8	2.27778	0.736504	9
Control Male	4.5	0.600925	10	2.19048	0.368086	7	3	0.881354	8	6.8	2.18607	10	4.44444	1.14396	9	2.33333	0.311805	9
Ethanol Male	3.98485	0.476972	11	3.77778	0.601567	9	1.875	0.279508	8	5.08333	1.27494	10	4.01852	0.876847	9	2.05	0.368556	10
Bin 2
Control Female	3.58333	0.805468	12	7.21429	1.8576	7	7.29167	1.53586	8	11	3.57071	7	6.72917	0.76502	8	2.55556	0.843457	9
Ethanol Female	4.83333	0.399916	12	7.71429	1.76897	7	8.125	2.04142	8	9.54167	1.10812	8	4.08333	0.9226	8	2.77778	0.646095	9
Control Male	5.7	1.04934	10	5.83333	1.63906	7	6.75	1.21743	8	9.3	1.82452	10	4.77778	0.707652	9	3.16667	0.57735	9
Ethanol Male	4.22727	0.549229	11	5.33333	1.87083	9	6	1.18397	8	6.91667	0.8848	10	7.27778	0.858868	9	2.85	0.695422	10
Bin 3
Control Female	3.23611	0.716114	12	8.57143	2.22387	7	4.89583	1.18478	8	10.3571	1.88577	7	6.22917	0.815851	8	3.55556	0.620509	9
Ethanol Female	3.19444	0.518932	12	7.02381	2.21838	7	6.875	1.57477	8	8.14583	0.762097	8	4.625	0.873865	8	2.88889	0.518932	9
Control Male	5.15	0.869387	10	4.83333	1.06533	7	8.75	1.5411	8	9.7	1.33583	10	5.77778	1.17293	9	4.72222	0.89019	9
Ethanol Male	4.78788	0.70999	11	7.33333	1.76973	9	5.9375	1.09967	8	8.23333	1.25639	10	7	1.01721	9	5.3	1.11106	10
Total
Control Female	10.3472	1.84631	12	18.8571	4.56007	7	15.8542	3.03705	8	28.0714	6.71568	7	16.6875	1.28075	8	8.38889	1.30112	9
Ethanol Female	13.0694	1.14288	12	20.6429	4.66077	7	19.3958	3.99242	8	22.5	1.86366	8	11.7917	2.50233	8	7.94444	1.30556	9
Control Male	15.35	2.18588	10	12.8571	2.34194	7	18.5	2.65754	8	25.8	4.80636	10	15	1.89297	9	10.2222	1.36451	9
Ethanol Male	13	1.49003	11	16.4444	4.04269	9	13.8125	1.86829	8	20.2333	2.13281	10	18.2963	1.88434	9	10.2	1.8918	10
Day 2- Number of Line Crossings
Bin 1
Control Female	5.94444	1.10713	12	6.35714	2.14563	7	6.58333	1.73748	8	12.2143	3.64799	7	5.64583	0.798335	8	3.27778	0.894082	9
Ethanol Female	8.56944	0.839738	12	10.881	3.38389	7	7.47917	1.11021	8	8.58333	0.820738	8	5.54167	2.08542	8	3.88889	1.81387	9
Control Male	7.3	1.28062	10	3.97619	0.51232	7	4.625	1.54616	8	11.35	3.80646	10	7.16667	2	9	4.05556	1.00845	9
Ethanol Male	6.84848	1.06895	11	6.38889	1.06646	9	3.625	0.595744	8	9.21667	2.39728	10	7.44444	1.91566	9	3.15	0.623832	10
Bin 2
Control Female	6.61111	1.48326	12	16.0714	3.7929	7	13.375	3.08763	8	22.7143	6.83379	7	12.5833	1.3898	8	5.77778	1.81451	9
Ethanol Female	9.41667	0.726048	12	17.381	5.10235	7	15.75	3.8114	8	18.6042	1.9599	8	8.95833	2.22222	8	4.77778	1.06429	9
Control Male	11.3	2.08859	10	12.2143	3.73028	7	13.125	2.81855	8	19.85	3.5824	10	9.27778	1.51637	9	5.83333	0.897527	9
Ethanol Male	8.54545	1.26832	11	11	4.03801	9	11.25	2.51247	8	14.6333	1.92094	10	15.7593	2.0316	9	5.7	1.40475	10
Bin 3
Control Female	6.25	1.32645	12	17.4286	5.34013	7	9.91667	2.16185	8	22	3.5051	7	12.6875	1.23581	8	6.5	1.02062	9
Ethanol Female	7.02778	1.21817	12	16.2143	5.8796	7	13.5833	3.23777	8	17.8542	1.98817	8	11	2.02465	8	5.55556	0.929622	9
Control Male	10.5	2.16025	10	9.02381	2.19319	7	18.25	2.72554	8	19.75	2.61539	10	10.6111	1.81387	9	11.3889	2.19813	9
Ethanol Male	10.7273	2.17647	11	13.7778	3.17008	9	11.3125	2.10216	8	17.3167	2.50191	10	14.2407	2.15042	9	10.4	2.1	10
Total
Control Female	18.8056	3.54486	12	39.8571	10.7092	7	29.875	5.50791	8	56.9286	12.7094	7	30.9167	2.35365	8	15.5556	2.64633	9
Ethanol Female	25.0139	2.44755	12	44.4762	11.3687	7	36.8125	7.70954	8	45.0417	3.71995	8	25.5	5.31507	8	14.2222	2.83224	9
Control Male	29.1	4.74857	10	25.2143	4.77326	7	36	5.10165	8	50.95	8.5422	10	27.0556	2.66725	9	21.2778	3.06765	9
Ethanol Male	26.1212	3.80856	11	31.1667	7.8837	9	26.1875	3.88672	8	41.1667	4.19832	10	37.4444	3.93779	9	19.25	3.30761	10

## Sheet: Y-Maze Stats
	B6			D2			BXD60			BXD71			BXD48A			BXD100
Y-Maze	F (DFm, DFd)	p-value	% of Total Variation	F (DFm, DFd)	p-value	% of Total Variation	F (DFm, DFd)	p-value	% of Total Variation	F (DFm, DFd)	p-value	% of Total Variation	F (DFm, DFd)	p-value	% of Total Variation	F (DFm, DFd)	p-value	% of Total Variation
Total Distance Travelled
Interaction	F (1, 40) = 0.03424	0.8541	0.07784	F (1, 29) = 0.2174	0.6445	0.7348	F (1, 27) = 0.04117	0.8407	0.1226	F (1, 30) = 0.8364	0.3677	2.136	F (1, 29) = 0.002146	0.9634	0.00725	F (1, 34) = 0.04313	0.8367	0.1182
Sex	F (1, 40) = 1.021	0.3183	2.322	F (1, 29) = 0.1721	0.6813	0.5817	F (1, 27) = 3.242	0.0829	9.66	F (1, 30) = 7.955	0.0084	20.31	F (1, 29) = 0.09648	0.7583	0.3259	F (1, 34) = 0.02259	0.8814	0.06194
Treatment	F (1, 40) = 2.988	0.0916	6.793	F (1, 29) = 0.2642	0.6111	0.8931	F (1, 27) = 3.057	0.0918	9.108	F (1, 30) = 0.1571	0.6946	0.4011	F (1, 29) = 0.5138	0.4793	1.736	F (1, 34) = 2.366	0.1332	6.487
Spontaneous Alternations
Interaction	F (1, 40) = 0.1389	0.7114	0.3395	F (1, 29) = 0.6660	0.4211	2.166	F (1, 27) = 0.08080	0.7784	0.2808	F (1, 30) = 0.9102	0.3477	2.672	F (1, 29) = 3.961	0.0561	11.83	F (1, 34) = 4.746	0.0364	11.74
Sex	F (1, 40) = 0.4390	0.5114	1.073	F (1, 29) = 0.1318	0.7192	0.4285	F (1, 27) = 1.603	0.2163	5.57	F (1, 30) = 0.3661	0.5497	1.075	F (1, 29) = 0.4160	0.524	1.243	F (1, 34) = 0.8408	0.3656	2.08
Treatment	F (1, 40) = 0.2987	0.5878	0.7301	F (1, 29) = 0.8077	0.3762	2.626	F (1, 27) = 0.08212	0.7766	0.2854	F (1, 30) = 2.015	0.1661	5.915	F (1, 29) = 0.1964	0.6609	0.5869	F (1, 34) = 1.065	0.3094	2.634
Total Number of Line Crossings
Interaction	F (1, 40) = 0.01019	0.9201	0.02026	F (1, 29) = 0.1794	0.675	0.5997	F (1, 27) = 1.587	0.2185	4.798	F (1, 30) = 0.002026	0.9644	0.005482	F (1, 29) = 0.05368	0.8184	0.1775	F (1, 34) = 0.3140	0.5789	0.8365
Sex	F (1, 40) = 4.638	0.0373	9.22	F (1, 29) = 0.6485	0.4272	2.168	F (1, 27) = 1.102	0.3031	3.332	F (1, 30) = 6.632	0.0152	17.95	F (1, 29) = 0.4200	0.522	1.389	F (1, 34) = 1.539	0.2232	4.1
Treatment	F (1, 40) = 6.028	0.0185	11.98	F (1, 29) = 0.07205	0.7903	0.2408	F (1, 27) = 3.314	0.0798	10.02	F (1, 30) = 0.4602	0.5028	1.245	F (1, 29) = 0.7954	0.3798	2.631	F (1, 34) = 1.757	0.1938	4.682
Time in A Zone
Interaction	F (1, 40) = 2.386	0.1303	5.628	F (1, 29) = 0.03522	0.8524	0.1068	F (1, 27) = 0.9072	0.3493	3.246	F (1, 30) = 0.1786	0.6756	0.588	F (1, 29) = 0.0004023	0.9841	0.001377	F (1, 34) = 0.0001968	0.9889	0.0005561
Sex	F (1, 40) = 0.0006548	0.9797	0.001545	F (1, 29) = 3.936	0.0568	11.93	F (1, 27) = 0.03023	0.8633	0.1081	F (1, 30) = 0.08534	0.7722	0.281	F (1, 29) = 0.1952	0.6619	0.6683	F (1, 34) = 0.06305	0.8032	0.1781
Treatment	F (1, 40) = 0.03310	0.8566	0.07807	F (1, 29) = 0.05991	0.8084	0.1817	F (1, 27) = 0.0002394	0.9878	0.0008565	F (1, 30) = 0.04587	0.8319	0.1511	F (1, 29) = 0.01572	0.9011	0.05383	F (1, 34) = 1.328	0.2572	3.752
Time in B Zone
Interaction	F (1, 40) = 0.05468	0.1289	0.8163	F (1, 29) = 5.405	0.0273	15.09	F (1, 27) = 0.3620	0.5524	1.292	F (1, 30) = 0.2269	0.6373	0.6993	F (1, 29) = 0.9387	0.3406	2.946	F (1, 34) = 1.974	0.1691	5.091
Sex	F (1, 40) = 0.2660	0.6269	0.6089	F (1, 29) = 0.6228	0.4364	1.738	F (1, 27) = 0.2605	0.6139	0.9294	F (1, 30) = 1.072	0.3088	3.304	F (1, 29) = 1.241	0.2744	3.895	F (1, 34) = 2.015	0.1648	5.197
Treatment	F (1, 40) = 1.963	4.627	0.1689	F (1, 29) = 0.9919	0.3275	2.768	F (1, 27) = 0.3785	0.5436	1.35	F (1, 30) = 0.7716	0.3867	2.378	F (1, 29) = 0.7463	0.3947	2.342	F (1, 34) = 0.9228	0.3435	2.38
Time in C Zone
Interaction	F (1, 40) = 1.124	0.2954	2.617	F (1, 29) = 2.807	0.1046	8.797	F (1, 27) = 0.003027	0.9565	0.01114	F (1, 30) = 0.02019	0.888	0.06572	F (1, 29) = 0.9952	0.3267	3.171	F (1, 34) = 2.562	0.1187	6.512
Sex	F (1, 40) = 0.2623	0.6114	0.6106	F (1, 29) = 0.04925	0.8259	0.1544	F (1, 27) = 0.05151	0.8222	0.1896	F (1, 30) = 0.1521	0.6993	0.4952	F (1, 29) = 1.001	0.3253	3.19	F (1, 34) = 2.667	0.1117	6.778
Treatment	F (1, 40) = 1.304	0.2602	3.037	F (1, 29) = 0.01162	0.9149	0.03642	F (1, 27) = 0.1149	0.7373	0.4229	F (1, 30) = 0.4389	0.5127	1.429	F (1, 29) = 0.4421	0.5113	1.409	F (1, 34) = 0.06498	0.8003	0.1651

## Sheet: Y-Maze Means
	B6			D2			BXD60			BXD71			BXD48A			BXD100
Y-Maze	Mean	SEM	N	Mean	SEM	N	Mean	SEM	N	Mean	SEM	N	Mean	SEM	N	Mean	SEM	N
Total Distance Travelled
Control Female	11.9197	0.844935	12	19.5577	2.1086	8	16.0512	1.50744	8	17.8516	1.35225	7	9.77279	1.26018	8	8.11761	0.433282	9
Ethanol Female	13.5225	0.743106	12	21.8099	2.83382	7	14.0109	1.23768	7	17.1976	2.02716	6	9.14692	0.626737	8	9.12439	0.823468	9
Control Male	12.921	1.0442	11	19.6759	1.9211	9	13.942	1.26041	8	13.1373	0.79718	10	10.106	1.16851	8	8.0742	0.927614	10
Ethanol Male	14.2139	0.490834	9	19.7856	2.3491	9	11.3661	1.21659	8	14.792	1.06492	11	9.39363	0.534506	9	9.39525	0.704231	10
Spontaneous Alternations
Control Female	61.9014	2.68529	12	51.5812	3.95905	8	57.9688	1.73681	8	64.2571	3.43212	7	56.5875	2.13807	8	72.4889	3.39276	9
Ethanol Female	62.3222	2.22112	12	51.2095	3.62265	7	57.9738	2.32025	7	63.1028	3.0978	6	64.2521	4.51539	8	61.9056	2.74603	9
Control Male	59.3955	2.18461	11	56.8833	1.37964	9	60.1187	1.95176	8	68.125	1.93898	10	64.8875	2.54774	8	68.33	3.5021	10
Ethanol Male	61.6204	2.40003	9	49.1722	6.68761	9	61.3687	2.64494	8	62.2371	1.79571	11	60.0148	2.90126	9	72.11	3.37476	10
Total Number of Line Crossings
Control Female	69.75	5.68333	12	108.188	12.6413	8	92.9792	10.1057	8	113.357	8.71077	7	58.5	8.00006	8	47.2222	3.301	9
Ethanol Female	84.5139	5.38866	12	110.048	13.3102	7	65.1667	6.23928	7	118.833	15.446	6	51.4167	4.29643	8	56.8333	5.41859	9
Control Male	82.7727	5.90507	11	103.611	11.2795	9	72.125	7.8392	8	90.7	4.69823	10	61.125	8.09858	8	56.4	5.55418	10
Ethanol Male	96.3704	5.94592	9	95.3148	10.8474	9	67.0625	10.5286	8	96.9545	7.13298	11	56.963	4.07205	9	60.3	5.46667	10
Time in A Zone
Control Female	154.994	7.92118	12	82.1063	9.40063	8	132.273	16.7872	8	132.45	9.66941	7	122.142	10.0754	8	131.439	23.479	9
Ethanol Female	165.088	6.35163	12	76.9738	11.3459	7	118.895	11.0775	7	134.417	10.4629	6	124.346	16.2372	8	109.317	14.9682	9
Control Male	166.245	7.93995	11	103.424	5.90437	9	116.706	15.0031	8	139.195	9.41607	10	115.75	13.3414	8	126.41	21.155	10
Ethanol Male	153.457	6.73561	9	102.746	16.8638	9	129.656	10.6013	8	133.186	7.48804	11	117.346	18.403	9	104.82	14.8256	10
Time in B Zone
Control Female	153.526	13.5259	12	187.787	19.1436	8	179.24	22.5754	8	174.779	7.65062	7	161.096	21.2566	8	132.217	16.7893	9
Ethanol Female	170.313	8.85007	12	133.679	19.8911	7	178.919	28.6141	7	170.133	8.99816	6	163.688	28.9864	8	204.122	28.0947	9
Control Male	150.632	8.82387	11	137.048	14.3589	9	181.394	18.6017	8	168.32	11.8206	10	212.512	20.2439	8	218.075	28.1406	10
Ethanol Male	162.617	6.11202	9	158.702	12.2777	9	152.669	24.6044	8	152.668	11.4986	11	167.27	26.3795	9	204.565	40.7135	10
Time in C Zone
Control Female	167.521	16.555	12	184.35	17.6168	8	164.783	11.9582	8	166.579	11.384	7	191.083	21.7211	8	200.544	32.1082	9
Ethanol Female	144.335	5.86767	12	219.064	22.1547	7	172.979	19.6356	7	173.444	11.976	6	183.623	25.4297	8	163.494	28.3349	9
Control Male	161.75	6.52738	11	216.537	22.8801	9	161.206	21.1229	8	169.85	9.04412	10	146.275	12.2712	8	111.52	21.5701	10
Ethanol Male	160.889	6.11252	9	177.048	23.6853	9	167.113	27.0801	8	180.465	14.9646	11	183.557	26.0695	9	162.605	27.9314	10

## Sheet: T-Maze
	B6			D2			BXD60			BXD71			BXD48A			BXD100
Y-Maze	F (DFm, DFd)	p-value	% of Total Variation	F (DFm, DFd)	p-value	% of Total Variation	F (DFm, DFd)	p-value	% of Total Variation	F (DFm, DFd)	p-value	% of Total Variation	F (DFm, DFd)	p-value	% of Total Variation	F (DFm, DFd)	p-value	% of Total Variation
Training Trial- Total Distance Travelled
Interaction	F (1, 42) = 0.7727	0.3844	1.719	F (1, 28) = 0.7863	0.3828	2.41	F (1, 28) = 0.1963	0.6611	0.6443	F (1, 31) = 2.798	0.1045	6.968	F (1, 28) = 0.06806	0.7961	0.2325	F (1, 34) = 0.01420	0.9058	0.03985
Sex	F (1, 42) = 0.03005	0.8632	0.06685	F (1, 28) = 3.774	0.0622	11.57	F (1, 28) = 2.106	0.1578	6.913	F (1, 31) = 5.588	0.0245	13.92	F (1, 28) = 0.8450	0.3658	2.887	F (1, 34) = 0.7333	0.3978	2.058
Treatment	F (1, 42) = 2.044	0.1602	4.546	F (1, 28) = 0.1988	0.6591	0.6094	F (1, 28) = 0.1645	0.6881	0.54	F (1, 31) = 1.776	0.1923	4.424	F (1, 28) = 0.4552	0.5054	1.555	F (1, 34) = 0.8773	0.3555	2.462
Training Trial- Number of Entries to Open Arm
Interaction	F (1, 42) = 1.378	0.2471	3.135	F (1, 28) = 0.1866	0.6691	0.5654	F (1, 28) = 0.9776	0.3313	3.074	F (1, 31) = 2.936	0.0966	7.556	F (1, 28) = 0.0003934	0.9843	0.001321	F (1, 34) = 0.2680	0.6081	0.7769
Sex	F (1, 42) = 0.1309	0.7194	0.2978	F (1, 28) = 4.859	0.0359	14.73	F (1, 28) = 2.024	0.1658	6.366	F (1, 31) = 3.944	0.0559	10.15	F (1, 28) = 1.290	0.2657	4.331	F (1, 34) = 0.08494	0.7725	0.2463
Treatment	F (1, 42) = 0.3703	0.5461	0.8427	F (1, 28) = 0.03576	0.8514	0.1084	F (1, 28) = 0.7961	0.3799	2.504	F (1, 31) = 1.985	0.1688	5.109	F (1, 28) = 0.5905	0.4487	1.983	F (1, 34) = 0.1181	0.7332	0.3424
Training Trial- Time in Open Arm
Interaction	F (1, 42) = 0.02042	0.8871	0.04798	F (1, 28) = 0.2043	0.6548	0.6787	F (1, 28) = 0.7032	0.4088	2.292	F (1, 31) = 0.0002120	0.9885	0.0005974	F (1, 28) = 1.847	0.185	5.324	F (1, 34) = 0.2164	0.6448	0.5837
Sex	F (1, 42) = 0.3917	0.5348	0.9203	F (1, 28) = 1.895	0.1796	6.297	F (1, 28) = 1.360	0.2533	4.434	F (1, 31) = 0.5168	0.4776	1.456	F (1, 28) = 1.576	0.2198	4.543	F (1, 34) = 2.577	0.1176	6.954
Treatment	F (1, 42) = 0.1416	0.7086	0.3327	F (1, 28) = 0.04825	0.8277	0.1603	F (1, 28) = 0.6148	0.4396	2.004	F (1, 31) = 3.977	0.055	11.21	F (1, 28) = 3.234	0.0829	9.325	F (1, 34) = 0.2982	0.5886	0.8045
Training Trial- Latency to Enter Open Arm
Interaction	F (1, 42) = 0.02694	0.8704	0.06127	F (1, 28) = 0.2926	0.5928	1.03	F (1, 28) = 1.876	0.1816	5.795	F (1, 31) = 0.09970	0.7543	0.3052	F (1, 28) = 0.9331	0.3423	2.955	F (1, 34) = 1.324	0.2579	3.725
Sex	F (1, 42) = 1.897	0.1757	4.314	F (1, 28) = 0.03498	0.853	0.1231	F (1, 28) = 2.500	0.1251	7.721	F (1, 31) = 0.6623	0.4219	2.028	F (1, 28) = 2.532	0.1228	8.018	F (1, 34) = 0.2071	0.6519	0.5829
Treatment	F (1, 42) = 0.04958	0.8249	0.1128	F (1, 28) = 0.06991	0.7934	0.2461	F (1, 28) = 0.001729	0.9671	0.00534	F (1, 31) = 0.8279	0.3699	2.534	F (1, 28) = 0.06709	0.7975	0.2124	F (1, 34) = 0.01441	0.9052	0.04056
STM Trial- Total Distance Travelled
Interaction	F (1, 42) = 1.821	0.1844	3.969	F (1, 28) = 0.2620	0.6128	0.8683	F (1, 28) = 0.01499	0.9034	0.04922	F (1, 31) = 0.4255	0.519	1.158	F (1, 28) = 5.827	0.0226	11.98	F (1, 34) = 0.2819	0.5989	0.7772
Sex	F (1, 42) = 1.656	0.2052	3.609	F (1, 28) = 1.822	0.1879	6.04	F (1, 28) = 1.860	0.1835	6.107	F (1, 31) = 3.869	0.0582	10.53	F (1, 28) = 11.65	0.002	23.97	F (1, 34) = 1.774	0.1918	4.89
Treatment	F (1, 42) = 0.3319	0.5676	0.7234	F (1, 28) = 0.1361	0.715	0.451	F (1, 28) = 0.5782	0.4534	1.899	F (1, 31) = 1.925	0.1752	5.238	F (1, 28) = 3.206	0.0842	6.593	F (1, 34) = 0.2453	0.6236	0.6764
STM Trial- Number of Entries to Familiar Arm
Interaction	F (1, 42) = 0.8168	0.3713	1.812	F (1, 28) = 0.5582	0.4612	1.834	F (1, 28) = 0.1687	0.6844	0.5403	F (1, 31) = 0.05800	0.8113	0.1492	F (1, 28) = 2.492	0.1256	7.094	F (1, 34) = 0.02912	0.8655	0.07915
Sex	F (1, 42) = 1.311	0.2586	2.909	F (1, 28) = 1.743	0.1974	5.727	F (1, 28) = 2.121	0.1564	6.791	F (1, 31) = 4.740	0.0372	12.19	F (1, 28) = 3.530	0.0707	10.05	F (1, 34) = 2.761	0.1058	7.504
Treatment	F (1, 42) = 0.8773	0.3543	1.946	F (1, 28) = 0.1997	0.6584	0.6562	F (1, 28) = 0.9427	0.3399	3.018	F (1, 31) = 3.420	0.074	8.797	F (1, 28) = 1.097	0.3039	3.122	F (1, 34) = 8.066e-005	0.9929	0.0002192
STM Trial- Time in Familiar Arm
Interaction	F (1, 42) = 0.4592	0.5017	1.051	F (1, 28) = 1.339	0.257	3.693	F (1, 28) = 0.06832	0.7957	0.2347	F (1, 31) = 0.8770	0.3563	2.394	F (1, 28) = 3.683	0.0652	10.95	F (1, 34) = 0.1304	0.7203	0.3608
Sex	F (1, 42) = 0.04543	0.8323	0.104	F (1, 28) = 1.240	0.275	3.42	F (1, 28) = 1.025	0.3199	3.523	F (1, 31) = 1.005	0.3238	2.743	F (1, 28) = 1.882	0.181	5.594	F (1, 34) = 0.8307	0.3685	2.299
Treatment	F (1, 42) = 1.241	0.2715	2.842	F (1, 28) = 6.180	0.0192	17.05	F (1, 28) = 0.01370	0.9077	0.04705	F (1, 31) = 3.223	0.0824	8.796	F (1, 28) = 0.04761	0.8289	0.1415	F (1, 34) = 1.203	0.2804	3.331
STM Trial- Latency to Enter Familiar Arm
Interaction	F (1, 42) = 0.9574	0.3334	2.142	F (1, 27) = 6.681e-005	0.9935	0.0002146	F (1, 27) = 0.1201	0.7316	0.4239	F (1, 30) = 0.7728	0.3863	2.137	F (1, 27) = 1.608	0.2156	5.523	F (1, 33) = 1.348	0.2539	3.803
Sex	F (1, 42) = 1.535	0.2222	3.435	F (1, 27) = 3.403	0.0761	10.93	F (1, 27) = 1.189	0.2852	4.195	F (1, 30) = 3.356	0.0769	9.279	F (1, 27) = 0.08131	0.7777	0.2793	F (1, 33) = 1.144	0.2926	3.226
Treatment	F (1, 42) = 0.1737	0.679	0.3885	F (1, 27) = 0.6052	0.4434	1.944	F (1, 27) = 3.666e-007	0.9995	1.294e-06	F (1, 30) = 1.972	0.1705	5.451	F (1, 27) = 0.4856	0.4918	1.668	F (1, 33) = 0.02262	0.8814	0.06381
STM Trial- Number of Entries to Novel Arm
Interaction	F (1, 42) = 1.493	0.2286	3.401	F (1, 28) = 1.125	0.298	3.67	F (1, 28) = 0.6735	0.4188	2.217	F (1, 31) = 0.5707	0.4557	1.484	F (1, 28) = 0.4107	0.5268	1.076	F (1, 34) = 0.7596	0.3896	2.082
Sex	F (1, 42) = 0.3891	0.5362	0.8864	F (1, 28) = 0.3908	0.5369	1.276	F (1, 28) = 1.397	0.2472	4.597	F (1, 31) = 5.981	0.0203	15.55	F (1, 28) = 5.265	0.0295	13.79	F (1, 34) = 1.425	0.2409	3.906
Treatment	F (1, 42) = 0.02300	0.8802	0.05239	F (1, 28) = 1.164	0.2899	3.798	F (1, 28) = 0.3114	0.5812	1.025	F (1, 31) = 1.420	0.2425	3.693	F (1, 28) = 4.893	0.0353	12.81	F (1, 34) = 0.2427	0.6255	0.6653
STM Trial- Time in Novel Arm
Interaction	F (1, 42) = 0.4890	0.4882	1.074	F (1, 28) = 0.1670	0.6859	0.5634	F (1, 28) = 0.5745	0.4548	1.982	F (1, 31) = 0.1086	0.744	0.3382	F (1, 28) = 0.9677	0.3337	3.287	F (1, 34) = 0.4652	0.4998	1.29
Sex	F (1, 42) = 1.178	0.2839	2.589	F (1, 28) = 0.6489	0.4273	2.19	F (1, 28) = 0.09721	0.7575	0.3353	F (1, 31) = 0.5593	0.4602	1.742	F (1, 28) = 0.3368	0.5663	1.144	F (1, 34) = 1.432	0.2398	3.971
Treatment	F (1, 42) = 1.932	0.1719	4.244	F (1, 28) = 0.8093	0.376	2.731	F (1, 28) = 0.3200	0.5761	1.104	F (1, 31) = 0.3502	0.5583	1.091	F (1, 28) = 0.1482	0.7032	0.5032	F (1, 34) = 0.1319	0.7187	0.3659
STM Trial- Latency to Enter Novel Arm
Interaction	F (1, 42) = 2.208	0.1448	4.902	F (1, 28) = 1.764	0.1948	5.644	F (1, 28) = 0.3386	0.5653	1.136	F (1, 31) = 0.6498	0.4263	1.932	F (1, 27) = 1.726	0.2	5.001	F (1, 32) = 0.1353	0.7154	0.3425
Sex	F (1, 42) = 0.2085	0.6503	0.4628	F (1, 28) = 1.454	0.238	4.652	F (1, 28) = 0.8271	0.3709	2.775	F (1, 31) = 1.851	0.1835	5.503	F (1, 27) = 5.732	0.0239	16.61	F (1, 32) = 1.056	0.3119	2.672
Treatment	F (1, 42) = 0.5244	0.473	1.164	F (1, 28) = 0.1510	0.7006	0.483	F (1, 28) = 0.6437	0.4291	2.159	F (1, 31) = 0.02058	0.8868	0.0612	F (1, 27) = 0.4187	0.523	1.213	F (1, 32) = 6.319	0.0172	15.99
STM Trial- d2- Time
Interaction	F (1, 42) = 0.4362	0.5126	0.9722	F (1, 28) = 1.122	0.2985	3.449	F (1, 28) = 0.6937	0.412	2.398	F (1, 31) = 1.101	0.3023	3.169	F (1, 28) = 2.593	0.1186	8.118	F (1, 34) = 0.05978	0.8083	0.1655
Sex	F (1, 42) = 0.4163	0.5223	0.928	F (1, 28) = 1.063	0.3113	3.267	F (1, 28) = 0.1162	0.7358	0.4016	F (1, 31) = 0.4744	0.4961	1.366	F (1, 28) = 1.033	0.3182	3.234	F (1, 34) = 1.127	0.296	3.12
Treatment	F (1, 42) = 2.089	0.1558	4.656	F (1, 28) = 2.698	0.1117	8.291	F (1, 28) = 0.1130	0.7393	0.3907	F (1, 31) = 1.702	0.2016	4.9	F (1, 28) = 0.3262	0.5725	1.021	F (1, 34) = 0.9475	0.3372	2.624
STM Trial- d2- Number of Entries
Interaction	F (1, 42) = 0.1067	0.7456	0.2402	F (1, 28) = 2.057	0.1626	6.628	F (1, 28) = 0.3118	0.581	1.069	F (1, 31) = 1.242	0.2737	3.599	F (1, 28) = 0.0006510	0.9798	0.002279	F (1, 34) = 0.3656	0.5494	1.064
Sex	F (1, 42) = 0.6111	0.4388	1.376	F (1, 28) = 1.133	0.2963	3.651	F (1, 28) = 0.3434	0.5626	1.178	F (1, 31) = 1.116	0.2988	3.236	F (1, 28) = 0.2347	0.6318	0.8218	F (1, 34) = 0.001297	0.9715	0.003775
Treatment	F (1, 42) = 1.721	0.1967	3.875	F (1, 28) = 0.05529	0.8158	0.1782	F (1, 28) = 0.5040	0.4836	1.728	F (1, 31) = 0.7902	0.3809	2.29	F (1, 28) = 0.3624	0.552	1.269	F (1, 34) = 0.004572	0.9465	0.0133
STM Trial- d2- Number of Line Crossings
Interaction	F (1, 42) = 0.09292	0.762	0.2107	F (1, 27) = 2.060	0.1627	6.675	F (1, 28) = 0.08668	0.7706	0.3028	F (1, 31) = 4.651	0.0389	12.76	F (1, 27) = 2.240e-008	0.9999	7.345e-08	F (1, 33) = 0.1265	0.7243	0.3812
Sex	F (1, 42) = 0.8655	0.3575	1.963	F (1, 27) = 1.220	0.2791	3.954	F (1, 28) = 0.5154	0.4788	1.8	F (1, 31) = 0.2168	0.6447	0.5949	F (1, 27) = 1.063	0.3117	3.484	F (1, 33) = 0.05101	0.8227	0.1537
Treatment	F (1, 42) = 1.165	0.2867	2.641	F (1, 27) = 0.8689	0.3595	2.816	F (1, 28) = 0.02721	0.8702	0.09503	F (1, 31) = 0.1594	0.6925	0.4373	F (1, 27) = 2.731	0.11	8.955	F (1, 33) = 0.008809	0.9258	0.02655

## Sheet: T-Maze Means
	B6			D2			BXD60			BXD71			BXD48A			BXD100
Y-Maze	Mean	SEM	N	Mean	SEM	N	Mean	SEM	N	Mean	SEM	N	Mean	SEM	N	Mean	SEM	N
Training Trial- Total Distance Travelled
Control Female	13.5873	0.726505	12	19.7207	1.80456	8	18.3015	1.42562	8	21.4864	2.22247	7	10.8746	1.37344	7	10.168	0.78935	9
Ethanol Female	15.3778	0.811826	12	20.4424	1.02061	7	18.2461	1.0359	8	16.6883	1.93351	8	10.0542	0.488031	8	10.7739	0.622251	9
Control Male	14.1346	1.00739	11	17.9922	1.80096	9	15.4975	1.8194	8	15.0419	1.18864	10	9.83972	0.761275	9	9.44495	0.827453	10
Ethanol Male	14.5616	0.443701	11	15.8108	1.55757	8	16.7537	1.53229	8	15.5846	1.20913	10	9.47683	0.808629	8	10.2276	0.688023	10
Training Trial- Number of Entries to Open Arm
Control Female	10.1528	0.720216	12	14.9375	2.10746	8	13.9375	1.39654	8	17.2143	1.62882	7	8.14286	1.19878	7	7.16667	0.650854	9
Ethanol Female	11.3472	0.69524	12	15.3095	1.05248	7	13.8125	0.6875	8	12.7708	1.91846	8	7.5625	0.625942	8	7.05556	0.467295	9
Control Male	11.1818	0.695024	11	12.2222	1.2832	9	10.8125	1.3361	8	11.95	1.2637	10	7.27778	0.595767	9	6.65	0.799479	10
Ethanol Male	10.803	0.53173	11	11.2708	1.38728	8	13.25	1.58396	8	12.3833	0.915251	10	6.66667	0.677735	8	7.2	0.553775	10
Training Trial- Time in Open Arm
Control Female	166.207	10.9707	12	162.238	18.3092	8	188.248	19.81	8	174.371	9.08434	7	157.94	25.4702	7	221.7	23.8137	9
Ethanol Female	159.068	12.5289	12	157.993	7.95519	7	188.981	9.12227	8	147.223	15.3284	8	220.883	21.9632	8	195.467	27.2062	9
Control Male	155.636	17.7155	11	179.133	14.6166	9	183.838	8.9155	8	164.46	12.6466	10	160.006	12.73	9	167.985	29.558	10
Ethanol Male	152.427	13.4933	11	191.406	25.8425	8	162	13.0116	8	137.705	13.8989	10	168.769	19.9981	8	165.885	22.1149	10
Training Trial- Latency to Enter Open Arm
Control Female	5.55556	1.45999	12	46.9125	21.6215	8	6.40833	0.745269	8	14.2357	3.42386	7	27.8929	17.8779	7	17.4833	6.06441	9
Ethanol Female	5.15278	1.02071	12	41.6095	18.2679	7	24.9708	9.59243	8	20.825	4.24615	8	9.77708	2.56073	8	36.8167	10.3355	9
Control Male	16.1636	13.0923	11	40.1259	13.8614	9	45.2188	21.0961	8	19.76	9.19558	10	37.1389	14.4898	9	41.915	25.2231	10
Ethanol Male	13.5015	5.6897	11	55.5688	22.2343	8	27.75	12.4215	8	33.3533	16.1555	10	47.5938	18.7536	8	26.235	8.80539	10
STM Trial- Total Distance Travelled
Control Female	5.88464	0.566639	12	6.8725	0.886002	8	7.38744	1.26197	8	9.17764	0.992738	7	6.23324	0.768011	7	3.65733	0.481024	9
Ethanol Female	7.25665	0.884067	12	6.98383	0.795768	7	7.95463	0.466937	8	7.21596	1.26214	8	6.62008	0.536998	8	4.14089	0.342781	9
Control Male	5.92936	0.58509	11	6.21976	0.598797	9	6.06619	0.909927	8	6.65845	0.733874	10	5.613	0.625889	9	3.28	0.521332	10
Ethanol Male	5.37832	0.747979	11	5.53381	0.828457	8	6.85106	0.723202	8	5.95145	0.856857	10	3.00467	0.54129	8	3.2632	0.493567	10
STM Trial- Number of Entries to Familiar Arm
Control Female	3.11111	0.387805	12	3.25	0.365963	8	3.45833	0.613788	8	5.42857	0.834013	7	3.30952	0.480339	7	2.11111	0.431227	9
Ethanol Female	3.95833	0.50964	12	3.38095	0.439026	7	4.22917	0.530739	8	4.02083	0.537703	8	3.5625	0.510735	8	2.16667	0.204124	9
Control Male	3	0.481475	11	3	0.448764	9	2.875	0.659748	8	3.8	0.6245	10	3.16667	0.513701	9	1.65	0.298608	10
Ethanol Male	3.01515	0.452521	11	2.47917	0.466579	8	3.1875	0.38888	8	2.71667	0.664371	10	1.91667	0.354954	8	1.6	0.266667	10
STM Trial- Time in Familiar Arm
Control Female	61.2181	11.0545	12	30.2063	3.57437	8	55.0729	10.0051	8	58.6071	3.64692	7	69.4167	12.2826	7	55.0667	11.667	9
Ethanol Female	66.0028	9.34073	12	62.8143	5.50495	7	58.3333	9.26529	8	52.3375	4.27959	8	42.7729	7.06625	8	74.5611	12.7081	9
Control Male	51.4545	11.833	11	30.5963	5.00787	9	48.6	8.09429	8	58.125	7.27791	10	62.5944	8.26001	9	72.08	15.4023	10
Ethanol Male	71.0939	11.6261	11	42.4917	15.8179	8	47.3563	6.74445	8	38.18	9.29607	10	83.7979	19.1297	8	81.92	12.8245	10
STM Trial- Latency to Enter Familiar Arm
Control Female	31.6792	10.9278	12	30.6125	10.6372	8	27.9625	12.0134	8	17.8786	5.79078	7	14.65	5.62502	7	54.7056	13.0751	9
Ethanol Female	14.9972	6.07539	12	22.6929	4.61409	7	23.8813	10.9032	8	25.8062	9.80865	8	33.1625	9.31573	8	42.7833	12.976	9
Control Male	34.7955	12.91	11	49.6759	10.7637	9	36.7357	14.3987	7	32.265	14.3106	10	29.2833	11.6657	9	28.3944	11.7282	9
Ethanol Male	41.5121	16.5009	11	41.5881	12.2819	7	40.8312	9.97718	8	66.7389	21.0438	9	23.9024	7.53517	7	43.865	9.45417	10
STM Trial- Number of Entries to Novel Arm
Control Female	3.73611	0.346008	12	4.3125	0.82882	8	4.58333	0.856233	8	5.35714	0.777008	7	4	0.645497	7	2.05556	0.305556	9
Ethanol Female	4.20833	0.485967	12	2.95238	0.415815	7	4.41667	0.383178	8	4.16667	0.762463	8	3.20833	0.337401	8	1.94444	0.256098	9
Control Male	4	0.47194	11	3.24074	0.478803	9	3.3125	0.626338	8	3.4	0.378594	10	3.16667	0.540062	9	1.45	0.283333	10
Ethanol Male	3.39394	0.451302	11	3.22917	0.702135	8	4.1875	0.582003	8	3.13333	0.560423	10	1.72917	0.454189	8	1.85	0.316667	10
STM Trial- Time in Novel Arm
Control Female	61.2181	11.0545	12	30.2063	3.57437	8	55.0729	10.0051	8	58.6071	3.64692	7	69.4167	12.2826	7	55.0667	11.667	9
Ethanol Female	66.0028	9.34073	12	62.8143	5.50495	7	58.3333	9.26529	8	52.3375	4.27959	8	42.7729	7.06625	8	74.5611	12.7081	9
Control Male	51.4545	11.833	11	30.5963	5.00787	9	48.6	8.09429	8	58.125	7.27791	10	62.5944	8.26001	9	72.08	15.4023	10
Ethanol Male	71.0939	11.6261	11	42.4917	15.8179	8	47.3563	6.74445	8	38.18	9.29607	10	83.7979	19.1297	8	81.92	12.8245	10
STM Trial- Latency to Enter Novel Arm
Control Female	41.6167	8.73303	12	52.6625	16.3142	8	48.0708	17.2326	8	40.2643	9.18479	7	29.6762	14.0633	7	59.6722	13.8008	9
Ethanol Female	21.2111	5.78068	12	38.7524	10.7105	7	44.9062	9.16524	8	31.2521	10.0475	8	21.7271	7.59632	8	29.1778	10.7258	9
Control Male	23.6818	10.3237	11	50.85	12.5129	9	43.3687	18.7229	8	47.805	15.8186	10	42.5611	12.4372	9	79.5	19.9791	9
Ethanol Male	30.7152	11.6361	11	76.2625	17.7778	8	23.5	9.62538	8	60.72	13.8697	10	65.9429	12.6817	7	38.55	10.1539	9
STM Trial- d2- Time
Control Female	0.489059	0.0712533	12	0.629428	0.060678	8	0.531397	0.0487781	8	0.417403	0.0273306	7	0.415328	0.073821	7	0.506122	0.0846744	9
Ethanol Female	0.438028	0.04326	12	0.439673	0.031365	7	0.500943	0.0623904	8	0.433192	0.065551	8	0.595972	0.0601272	8	0.393901	0.085245	9
Control Male	0.57396	0.0804051	11	0.627442	0.0533207	9	0.501229	0.0877679	8	0.395142	0.0473652	10	0.464512	0.0575564	9	0.385788	0.104297	10
Ethanol Male	0.437039	0.0610527	11	0.586487	0.10724	8	0.572901	0.0325618	8	0.54057	0.0773124	10	0.378462	0.123505	8	0.318623	0.08921	10
STM Trial- d2- Number of Entries
Control Female	0.550967	0.0292277	12	0.547619	0.0284579	8	0.567541	0.0204938	8	0.497956	0.0264646	7	0.530941	0.0486095	7	0.508623	0.042143	9
Ethanol Female	0.520626	0.0180963	12	0.462104	0.0216361	7	0.517614	0.0202048	8	0.487499	0.0215579	8	0.489287	0.0278526	8	0.466823	0.0366256	9
Control Male	0.585101	0.0353757	11	0.528673	0.0407866	9	0.56863	0.0701528	8	0.495278	0.0460699	10	0.49709	0.0626102	9	0.468788	0.0806679	10
Ethanol Male	0.534643	0.0385688	11	0.590097	0.0843515	8	0.562664	0.0211989	8	0.588205	0.0599857	10	0.458823	0.0994783	8	0.50218	0.0695256	10
STM Trial- d2- Number of Line Crossings
Control Female	0.528219	0.0381057	12	0.548996	0.0508928	8	0.54801	0.0611067	8	0.571034	0.0355804	7	0.562223	0.0425815	7	0.505555	0.0671281	9
Ethanol Female	0.567078	0.0427372	12	0.385084	0.0434712	7	0.517999	0.0513659	8	0.483613	0.0341468	8	0.454609	0.0554868	8	0.487702	0.06926	9
Control Male	0.559607	0.0483667	11	0.526102	0.0690255	9	0.575681	0.0929852	8	0.486918	0.0434924	10	0.495102	0.0749849	9	0.496703	0.0790238	10
Ethanol Male	0.629061	0.069013	11	0.560935	0.100562	7	0.58414	0.0453441	8	0.614053	0.0638641	10	0.387469	0.0730714	7	0.527357	0.0506303	9
